# Supplementary material for: Circulating Lipids Predict Mortality and Drive Immune Gene Regulation in Acute-on-Chronic Liver Failure
Source: Research Square preprint supplement (doi:10.21203/rs.3.rs-8154019/v1), 2025-12-02
Supplement: Supplementary file 2 [file 0f02887d48bc94058b9c1266.docx]

**Supplementary Figure S5. Structural Overlay of Selected Docked Lipids with Garcinoic Acid (GA) in the PPARγ Binding Pocket (PDB: 7AWD).**


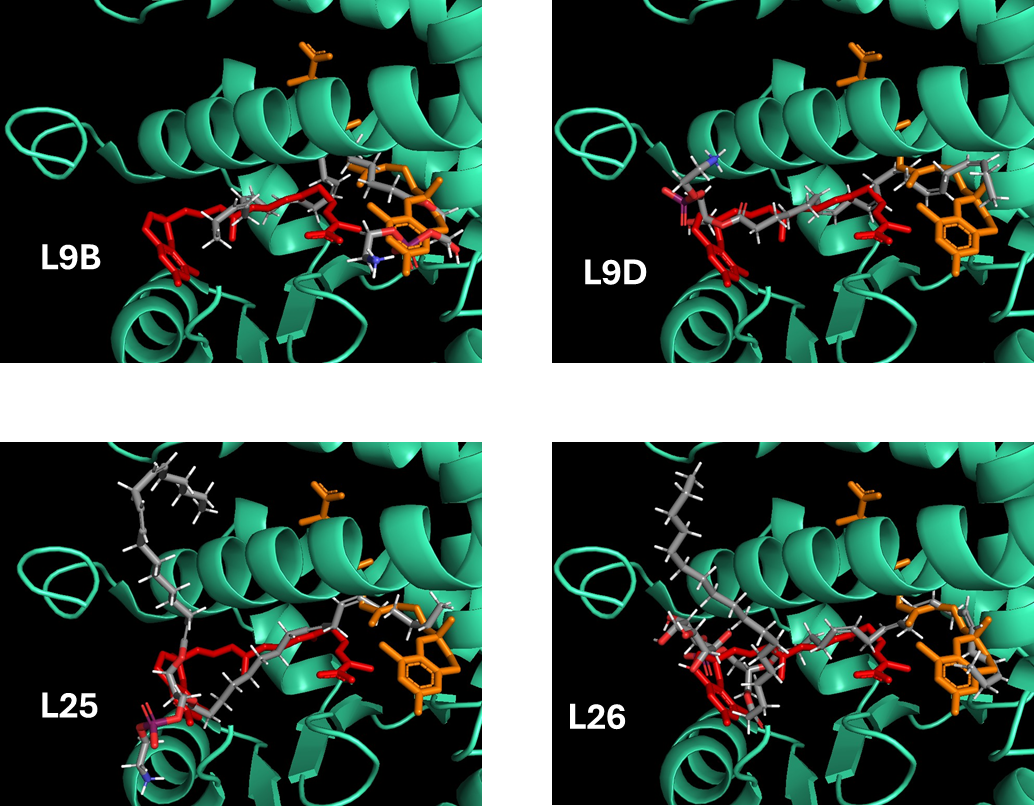


Representative docked lipid ligands (L9B, L9D, L25, and L26; gray) superimposed with two co-crystallized GA molecules in the PPARγ ligand-binding domain. GA in the orthosteric pocket is shown in red, and GA in the allosteric pocket in orange. Docking used the crystal structure of the GA–PPARγ complex.
