# Supplementary material for: Circulating Lipids Predict Mortality and Drive Immune Gene Regulation in Acute-on-Chronic Liver Failure
Source: Research Square preprint supplement (doi:10.21203/rs.3.rs-8154019/v1), 2025-12-02
Supplement: Supplementary file 3 [file 2b140c6fb2b4e55f151a2929.docx]

**Supplementary Table S4**

Diagnostic Performance of Plasma Lipids and Clinical Parameters for Predicting Mortality in ACLF

|  | **Cut-off** | **Sensitivity** | **Specificity** | **AUC** | **Std. Error** | **95% CI of AUC** | **p** |
| --- | --- | --- | --- | --- | --- | --- | --- |
| LPE(18:2) | ≤17.846155185 | 75.00% | 70.00% | **0.707** | 0.071 | [0.568, 0.846] | 0.004 |
| LPE(20:4) | ≤15.9176701 | 82.14% | 66.67% | **0.729** | 0.067 | [0.597, 0.860] | <.001 |
| PE(O-18:0/16:1) | ≥20.00652862 | 75.00% | 66.67% | 0.674 | 0.073 | [0.531, 0.816] | 0.017 |
| PE(P-18.2/18.2) | ≤17.167182735 | 100.00% | 30.00% | 0.635 | 0.074 | [0.490, 0.779] | 0.069 |
| TAG48:1-FA16:1 | ≥19.939806705 | 50.00% | 83.33% | 0.664 | 0.073 | [0.522, 0.807] | 0.024 |
| TLC | ≥7490 | 89.29% | 43.33% | **0.702** | 0.069 | [0.567, 0.836] | 0.003 |
| INR | ≥3.44 | 39.29% | 100.00% | 0.699 | 0.071 | [0.559, 0.838] | 0.005 |
| Urea | ≥106.5 | 39.29% | 90.00% | 0.680 | 0.071 | [0.542, 0.818] | 0.011 |
| Creatinine | ≥3.25 | 28.57% | 96.67% | 0.645 | 0.074 | [0.501, 0.789] | 0.049 |
| Meld score | ≥32.79469 | 64.29% | 76.67% | 0.692 | 0.072 | [0.551, 0.832] | 0.008 |
| MELD-NA | ≥33.151895 | 67.86% | 80.00% | **0.729** | 0.068 | [0.596, 0.862] | <.001 |
| CTP | ≥12.5 | 60.71% | 86.67% | **0.742** | 0.065 | [0.615, 0.870] | <.001 |
| Predicted mortality (Logit) | ≥0.5 | 78.57% | 86.67% | **0.912** | 0.035 | [0.843, 0.981] | <.001 |
