# Supplementary material for: Circulating Lipids Predict Mortality and Drive Immune Gene Regulation in Acute-on-Chronic Liver Failure
Source: Research Square preprint supplement (doi:10.21203/rs.3.rs-8154019/v1), 2025-12-02
Supplement: Supplementary file 4 [file 2b477714aa437cf79b9168a4.docx]

**Supplementary Table S6**

TAG- enriched differential lipids signature in lipid incorporation assay

| Species | Fold change | p.value |
| --- | --- | --- |
| TAG(48:2/FA18:1)+NH4 | 5.2951 | 0.006107 |
| TAG(46:4/FA18:2)+NH4 | 4.9453 | 0.007787 |
| CER(22:1)+H | 4.3607 | 0.012055 |
| TAG(47:2/FA16:1)+NH4 | 3.9878 | 0.016295 |
| PE(P-16:0/18:0)-H | -3.7675 | 0.019646 |
| PE(O-18:0/18:2)-H | -3.6053 | 0.022652 |
| PG(16:0/22:5)-H | 3.5781 | 0.023206 |
| PA(18:2/16:1)-H | 3.5122 | 0.024622 |
| MAG(20:0)+NH4 | -3.4375 | 0.026354 |
| PE(16:0/22:6)-H | 3.4365 | 0.026378 |
| TAG(56:8/FA18:1)+NH4 | -3.4094 | 0.027043 |
| TAG(51:4/FA18:2)+NH4 | 3.2204 | 0.032269 |
| TAG(58:10/FA20:5)+NH4 | 3.1699 | 0.03386 |
| PE(O-16:0/18:0)-H | -3.0802 | 0.036923 |
| TAG(48:1/FA16:1)+NH4 | 3.072 | 0.037219 |
| DCER(24:1)+H | 3.0639 | 0.037517 |
| PS(18:2/20:1)-H | -2.9765 | 0.040882 |
| TAG(52:4/FA20:3)+NH4 | 2.9159 | 0.043421 |
| TAG(50:3/FA18:3)+NH4 | 2.8698 | 0.045477 |
| PC(16:0/18:2)+AcO | 2.8192 | 0.047866 |
| TAG(52:6/FA22:6)+NH4 | -2.7952 | 0.049052 |
