# Supplementary material for: Circulating Lipids Predict Mortality and Drive Immune Gene Regulation in Acute-on-Chronic Liver Failure
Source: Research Square preprint supplement (doi:10.21203/rs.3.rs-8154019/v1), 2025-12-02
Supplement: Supplementary file 7 [file 46e0ad7949858d031509d599.docx]

**Supplementary Table S2**

**Total 316 differential lipids among ACLF vs healthy controls**

| | Species | f.value | p.value | FDR | Fisher's LSD | | --- | --- | --- | --- | --- | | PE.O.18.0.16.1..H | 188.92 | 8.15E-32 | 5.19E-29 | ACLF NS - ACLF S; ACLF NS - HC; ACLF S - HC | | PE.O.18.0.16.0..H | 139.08 | 2.22E-27 | 7.06E-25 | ACLF NS - HC; ACLF S - HC | | PC.16.0.16.1..AcO | 112.15 | 1.92E-24 | 3.05E-22 | ACLF NS - HC; ACLF S - HC | | PE.P.18.2.18.2..H | 91.823 | 7.28E-22 | 5.12E-20 | ACLF S - ACLF NS; HC - ACLF NS; HC - ACLF S | | LPE.20.4..H | 91.161 | 8.97E-22 | 5.18E-20 | ACLF S - ACLF NS; HC - ACLF NS; HC - ACLF S | | LPC.14.0..AcO | 90.523 | 1.10E-21 | 5.82E-20 | ACLF S - ACLF NS; HC - ACLF NS; HC - ACLF S | | PC.16.0.16.0..AcO | 56.205 | 3.21E-16 | 8.51E-15 | ACLF NS - HC; ACLF S - HC | | LPE.18.2..H | 55.569 | 4.22E-16 | 9.94E-15 | ACLF S - ACLF NS; HC - ACLF NS; HC - ACLF S | | LPE.22.5..H | 52.972 | 1.31E-15 | 2.98E-14 | HC - ACLF NS; HC - ACLF S | | PC.18.1.18.1..AcO | 52.556 | 1.58E-15 | 3.46E-14 | ACLF NS - HC; ACLF S - HC | | PS.16.0.18.1..H | 47.581 | 1.53E-14 | 2.94E-13 | ACLF S - ACLF NS; ACLF NS - HC; ACLF S - HC | | PA.16.0.16.0..H | 45.235 | 4.65E-14 | 7.58E-13 | ACLF NS - HC; ACLF S - HC | | PC.18.0.18.1..AcO | 33.824 | 1.68E-11 | 2.01E-10 | ACLF NS - HC; ACLF S - HC | | PC.18.0.16.1..AcO | 29.18 | 2.39E-10 | 2.37E-09 | ACLF NS - HC; ACLF S - HC | | PC.16.1.18.1..AcO | 24.8 | 3.43E-09 | 2.84E-08 | ACLF NS - HC; ACLF S - HC | | PA.16.0.18.1..H | 24.71 | 3.64E-09 | 2.96E-08 | ACLF NS - HC; ACLF S - HC | | DAG.16.0.16.1..NH4 | 22.215 | 1.80E-08 | 1.35E-07 | ACLF NS - HC; ACLF S - HC | | PC.16.0.18.1..AcO | 20.248 | 6.66E-08 | 4.65E-07 | ACLF NS - HC; ACLF S - HC | | PE.P.16.0.16.1..H | 19.317 | 1.25E-07 | 8.31E-07 | ACLF NS - HC; ACLF S - HC | | PS.20.0.18.1..H | 18.103 | 2.90E-07 | 1.85E-06 | ACLF NS - HC; ACLF S - HC | | TAG.48.1.FA16.1..NH4 | 13.079 | 1.14E-05 | 5.78E-05 | ACLF NS - ACLF S; ACLF NS - HC; ACLF S - HC | | PE.O.16.0.18.3..H | 11.906 | 2.80E-05 | 0.0001239 | HC - ACLF NS; HC - ACLF S | | DAG.16.1.20.2..NH4 | 11.378 | 4.24E-05 | 0.0001798 | ACLF NS - HC; ACLF S - HC | | CE.24.1..H | 10.882 | 6.28E-05 | 0.0002542 | ACLF S - ACLF NS; ACLF NS - HC; ACLF S - HC | | PC.18.1.16.1..AcO | 8.9737 | 0.0002937 | 0.000999 | ACLF NS - HC; ACLF S - HC | | MAG.20.0..NH4 | 8.4587 | 0.0004499 | 0.001475 | ACLF NS - HC; ACLF S - HC | | DAG.16.0.18.3..NH4 | 8.0072 | 0.0006563 | 0.0021101 | ACLF NS - HC; ACLF S - HC | | PI.18.0.20.5..H | 6.5848 | 0.0022053 | 0.0062614 | ACLF NS - ACLF S; ACLF NS - HC | | PI.18.1.18.1..H | 5.768 | 0.0044948 | 0.011682 | ACLF NS - HC; ACLF S - HC | | DAG.14.0.18.3..NH4 | 4.2943 | 0.016762 | 0.035894 | ACLF S - HC | | LPC.20.3..AcO | 112.32 | 1.83E-24 | 3.05E-22 | HC - ACLF NS; HC - ACLF S | | LPE.20.3..H | 110.05 | 3.41E-24 | 4.34E-22 | ACLF S - ACLF NS; HC - ACLF NS; HC - ACLF S | | PE.P.18.0.20.5..H | 107.04 | 7.90E-24 | 8.37E-22 | HC - ACLF NS; HC - ACLF S | | LPC.20.4..AcO | 97.035 | 1.46E-22 | 1.33E-20 | ACLF S - ACLF NS; HC - ACLF NS; HC - ACLF S | | PE.O.16.0.22.5..H | 95.648 | 2.23E-22 | 1.77E-20 | HC - ACLF NS; HC - ACLF S | | PE.16.0.16.0..H | 91.503 | 8.05E-22 | 5.12E-20 | ACLF NS - HC; ACLF S - HC | | LPC.18.2..AcO | 89.11 | 1.72E-21 | 8.42E-20 | ACLF S - ACLF NS; HC - ACLF NS; HC - ACLF S | | PE.P.18.2.20.4..H | 83.077 | 1.24E-20 | 5.65E-19 | HC - ACLF NS; HC - ACLF S | | PE.O.18.0.18.1..H | 82.1 | 1.73E-20 | 7.34E-19 | ACLF NS - HC; ACLF S - HC | | PC.18.2.18.2..AcO | 78.341 | 6.30E-20 | 2.50E-18 | HC - ACLF NS; HC - ACLF S | | LPC.18.3..AcO | 74.659 | 2.32E-19 | 8.69E-18 | HC - ACLF NS; HC - ACLF S | | PE.O.16.0.22.6..H | 73.14 | 4.03E-19 | 1.42E-17 | HC - ACLF NS; HC - ACLF S | | LPC.22.5..AcO | 67.544 | 3.26E-18 | 1.09E-16 | HC - ACLF NS; HC - ACLF S | | PE.O.16.0.20.4..H | 64.303 | 1.15E-17 | 3.66E-16 | HC - ACLF NS; HC - ACLF S | | PE.18.0.18.1..H | 63.864 | 1.37E-17 | 4.15E-16 | ACLF NS - HC; ACLF S - HC | | PA.20.0.20.4..H | 58.999 | 9.89E-17 | 2.86E-15 | ACLF S - ACLF NS; HC - ACLF NS; HC - ACLF S | | PE.O.16.0.20.5..H | 57.868 | 1.59E-16 | 4.39E-15 | HC - ACLF NS; HC - ACLF S | | PE.16.0.16.1..H | 55.827 | 3.78E-16 | 9.61E-15 | ACLF NS - HC; ACLF S - HC | | MAG.20.1..NH4 | 55.72 | 3.96E-16 | 9.68E-15 | ACLF NS - HC; ACLF S - HC | | PE.18.2.20.4..H | 52.065 | 1.96E-15 | 4.16E-14 | ACLF S - ACLF NS; HC - ACLF NS; HC - ACLF S | | PA.20.0.16.1..H | 50.937 | 3.26E-15 | 6.68E-14 | ACLF NS - HC; ACLF S - HC | | LPE.20.0..H | 48.092 | 1.20E-14 | 2.39E-13 | HC - ACLF NS; HC - ACLF S | | LPG.18.1..H | 47.069 | 1.94E-14 | 3.63E-13 | ACLF S - ACLF NS; ACLF NS - HC; ACLF S - HC | | PA.18.0.18.2..H | 46.278 | 2.82E-14 | 5.13E-13 | ACLF S - ACLF NS; HC - ACLF NS; HC - ACLF S | | MAG.16.0..NH4 | 46.207 | 2.92E-14 | 5.16E-13 | ACLF NS - HC; ACLF S - HC | | PE.P.16.0.20.3..H | 45.529 | 4.04E-14 | 6.94E-13 | HC - ACLF NS; HC - ACLF S | | PE.P.16.0.18.3..H | 45.469 | 4.16E-14 | 6.95E-13 | HC - ACLF NS; HC - ACLF S | | PE.P.18.0.18.3..H | 43.487 | 1.09E-13 | 1.73E-12 | HC - ACLF NS; HC - ACLF S | | PE.P.18.0.20.4..H | 41.72 | 2.62E-13 | 4.06E-12 | ACLF S - ACLF NS; HC - ACLF NS; HC - ACLF S | | PE.18.2.18.2..H | 40.953 | 3.85E-13 | 5.83E-12 | HC - ACLF NS; HC - ACLF S | | PE.O.16.0.20.3..H | 40.086 | 5.99E-13 | 8.69E-12 | HC - ACLF NS; HC - ACLF S | | PE.O.16.0.18.2..H | 40.041 | 6.13E-13 | 8.69E-12 | HC - ACLF NS; HC - ACLF S | | PA.18.1.18.1..H | 40.034 | 6.15E-13 | 8.69E-12 | ACLF NS - HC; ACLF S - HC | | PS.16.0.16.0..H | 39.153 | 9.68E-13 | 1.34E-11 | ACLF NS - HC; ACLF S - HC | | PE.P.18.1.20.5..H | 37.599 | 2.18E-12 | 2.95E-11 | HC - ACLF NS; HC - ACLF S | | PE.P.18.0.16.0..H | 37.082 | 2.86E-12 | 3.80E-11 | ACLF NS - HC; ACLF S - HC | | MAG.22.5..NH4 | 36.949 | 3.08E-12 | 3.99E-11 | ACLF NS - HC; ACLF S - HC | | PS.16.0.16.1..H | 36.216 | 4.55E-12 | 5.79E-11 | ACLF NS - HC; ACLF S - HC | | MAG.20.3..NH4 | 36.171 | 4.66E-12 | 5.81E-11 | ACLF NS - HC; ACLF S - HC | | PA.18.0.20.3..H | 34.259 | 1.32E-11 | 1.61E-10 | HC - ACLF NS; HC - ACLF S | | PC.18.2.20.3..AcO | 33.621 | 1.88E-11 | 2.21E-10 | HC - ACLF NS; HC - ACLF S | | PS.18.1.18.1..H | 33.258 | 2.30E-11 | 2.66E-10 | ACLF NS - HC; ACLF S - HC | | PE.P.18.0.20.3..H | 32.884 | 2.83E-11 | 3.22E-10 | HC - ACLF NS; HC - ACLF S | | LPC.16.0..AcO | 32.434 | 3.65E-11 | 4.07E-10 | ACLF S - ACLF NS; HC - ACLF NS; HC - ACLF S | | LPE.20.2..H | 31.998 | 4.67E-11 | 5.12E-10 | HC - ACLF NS; HC - ACLF S | | PA.16.0.16.1..H | 31.138 | 7.63E-11 | 8.23E-10 | ACLF NS - HC; ACLF S - HC | | PE.P.18.0.22.5..H | 30.453 | 1.13E-10 | 1.20E-09 | HC - ACLF NS; HC - ACLF S | | PA.20.0.22.5..H | 30.331 | 1.22E-10 | 1.27E-09 | HC - ACLF NS; HC - ACLF S | | LPE.22.4..H | 29.736 | 1.72E-10 | 1.76E-09 | HC - ACLF NS; HC - ACLF S | | PC.16.0.20.3..AcO | 29.681 | 1.78E-10 | 1.79E-09 | HC - ACLF NS; HC - ACLF S | | LPC.20.0..AcO | 29.125 | 2.46E-10 | 2.41E-09 | HC - ACLF NS; HC - ACLF S | | PA.20.0.18.2..H | 29.017 | 2.63E-10 | 2.53E-09 | ACLF S - ACLF NS; HC - ACLF NS; HC - ACLF S | | PA.20.0.18.3..H | 28.868 | 2.87E-10 | 2.72E-09 | HC - ACLF NS; HC - ACLF S | | LPC.16.1..AcO | 28.72 | 3.13E-10 | 2.93E-09 | ACLF S - ACLF NS; HC - ACLF NS; HC - ACLF S | | LPE.18.3..H | 28.611 | 3.34E-10 | 3.08E-09 | ACLF S - ACLF NS; HC - ACLF NS; HC - ACLF S | | PA.20.0.20.3..H | 27.856 | 5.25E-10 | 4.77E-09 | HC - ACLF NS; HC - ACLF S | | PA.20.0.20.5..H | 26.908 | 9.31E-10 | 8.34E-09 | HC - ACLF NS; HC - ACLF S | | PC.18.2.20.4..AcO | 26.65 | 1.09E-09 | 9.63E-09 | HC - ACLF NS; HC - ACLF S | | LPC.20.2..AcO | 25.96 | 1.67E-09 | 1.45E-08 | HC - ACLF NS; HC - ACLF S | | PE.P.18.1.22.5..H | 25.556 | 2.14E-09 | 1.84E-08 | HC - ACLF NS; HC - ACLF S | | MAG.22.4..NH4 | 24.898 | 3.23E-09 | 2.74E-08 | ACLF NS - HC; ACLF S - HC | | PE.P.18.0.22.4..H | 24.855 | 3.32E-09 | 2.78E-08 | ACLF S - ACLF NS; HC - ACLF NS; HC - ACLF S | | PA.18.0.20.5..H | 24.676 | 3.71E-09 | 2.99E-08 | HC - ACLF NS; HC - ACLF S | | PC.18.0.20.3..AcO | 23.083 | 1.03E-08 | 8.15E-08 | ACLF S - ACLF NS; HC - ACLF NS; HC - ACLF S | | PE.18.1.18.1..H | 22.798 | 1.23E-08 | 9.63E-08 | ACLF NS - HC; ACLF S - HC | | LPE.20.1..H | 22.787 | 1.24E-08 | 9.63E-08 | HC - ACLF NS; HC - ACLF S | | PE.18.0.18.0..H | 22.513 | 1.48E-08 | 1.14E-07 | ACLF NS - HC; ACLF S - HC | | PE.P.18.1.18.3..H | 22.297 | 1.71E-08 | 1.29E-07 | HC - ACLF NS; HC - ACLF S | | PE.O.16.0.16.1..H | 21.661 | 2.59E-08 | 1.92E-07 | ACLF NS - HC; ACLF S - HC | | PE.P.18.0.18.2..H | 21.032 | 3.94E-08 | 2.88E-07 | ACLF S - ACLF NS; HC - ACLF NS; HC - ACLF S | | LPC.22.4..AcO | 20.856 | 4.43E-08 | 3.20E-07 | HC - ACLF NS; HC - ACLF S | | PC.18.1.20.1..AcO | 20.766 | 4.70E-08 | 3.36E-07 | ACLF NS - HC; ACLF S - HC | | DAG.18.1.22.5..NH4 | 20.262 | 6.59E-08 | 4.65E-07 | ACLF NS - ACLF S; ACLF NS - HC; ACLF S - HC | | LPC.18.0..AcO | 20.116 | 7.28E-08 | 5.03E-07 | ACLF S - ACLF NS; HC - ACLF NS; HC - ACLF S | | LPC.18.1..AcO | 20.068 | 7.52E-08 | 5.14E-07 | HC - ACLF NS; HC - ACLF S | | PE.P.18.0.22.6..H | 19.808 | 8.96E-08 | 6.06E-07 | HC - ACLF NS; HC - ACLF S | | PE.14.0.20.4..H | 19.47 | 1.13E-07 | 7.56E-07 | HC - ACLF NS; HC - ACLF S | | MAG.22.1..NH4 | 18.966 | 1.59E-07 | 1.05E-06 | ACLF NS - HC; ACLF S - HC | | PE.O.18.0.20.5..H | 18.522 | 2.17E-07 | 1.41E-06 | HC - ACLF NS; HC - ACLF S | | PC.16.0.20.5..AcO | 18.459 | 2.27E-07 | 1.46E-06 | HC - ACLF NS; HC - ACLF S | | PE.O.16.0.22.4..H | 17.95 | 3.23E-07 | 2.03E-06 | HC - ACLF NS; HC - ACLF S | | PC.14.0.18.2..AcO | 17.748 | 3.72E-07 | 2.32E-06 | HC - ACLF NS; HC - ACLF S | | PI.18.1.16.1..H | 17.021 | 6.23E-07 | 3.85E-06 | ACLF NS - HC; ACLF S - HC | | PE.18.0.16.1..H | 16.576 | 8.55E-07 | 5.23E-06 | ACLF NS - HC; ACLF S - HC | | PE.18.1.16.1..H | 16.512 | 8.96E-07 | 5.43E-06 | ACLF NS - HC; ACLF S - HC | | PE.P.18.1.22.6..H | 16.175 | 1.14E-06 | 6.85E-06 | HC - ACLF NS; HC - ACLF S | | PE.16.0.14.0..H | 16.124 | 1.18E-06 | 7.04E-06 | ACLF NS - HC; ACLF S - HC | | PA.18.1.16.1..H | 16.037 | 1.26E-06 | 7.43E-06 | ACLF NS - HC; ACLF S - HC | | PE.18.2.20.3..H | 15.889 | 1.40E-06 | 8.20E-06 | HC - ACLF NS; HC - ACLF S | | DAG.18.0.18.1..NH4 | 15.833 | 1.46E-06 | 8.46E-06 | ACLF NS - HC; ACLF S - HC | | TAG.40.0.FA14.0..NH4 | 15.41 | 1.99E-06 | 1.14E-05 | ACLF NS - HC; ACLF S - HC | | PE.O.16.0.16.0..H | 14.558 | 3.73E-06 | 2.12E-05 | ACLF NS - HC; ACLF S - HC | | LPE.22.6..H | 14.305 | 4.50E-06 | 2.54E-05 | ACLF S - ACLF NS; HC - ACLF NS; HC - ACLF S | | PE.18.2.22.4..H | 14.154 | 5.04E-06 | 2.81E-05 | HC - ACLF NS; HC - ACLF S | | DAG.18.2.22.6..NH4 | 13.923 | 6.00E-06 | 3.32E-05 | ACLF NS - HC; ACLF S - HC | | PE.18.2.16.1..H | 13.786 | 6.64E-06 | 3.64E-05 | HC - ACLF NS; HC - ACLF S | | DAG.16.0.20.4..NH4 | 13.772 | 6.71E-06 | 3.65E-05 | ACLF NS - HC; ACLF S - HC | | PE.P.18.0.16.1..H | 13.706 | 7.06E-06 | 3.80E-05 | ACLF NS - HC; ACLF S - HC | | PS.20.0.16.1..H | 13.673 | 7.24E-06 | 3.87E-05 | ACLF NS - ACLF S; ACLF NS - HC; ACLF S - HC | | DCER.22.0..H | 13.594 | 7.68E-06 | 4.07E-05 | HC - ACLF NS; HC - ACLF S | | PA.18.0.18.3..H | 13.535 | 8.03E-06 | 4.22E-05 | HC - ACLF NS; HC - ACLF S | | DAG.16.0.22.6..NH4 | 13.226 | 1.01E-05 | 5.27E-05 | ACLF NS - HC; ACLF S - HC | | LPE.18.1..H | 13.22 | 1.02E-05 | 5.27E-05 | HC - ACLF NS; HC - ACLF S | | MAG.20.4..NH4 | 13.141 | 1.08E-05 | 5.55E-05 | ACLF NS - HC; ACLF S - HC | | PA.18.0.16.1..H | 13.012 | 1.19E-05 | 6.03E-05 | ACLF NS - HC; ACLF S - HC | | PS.14.0.20.1..H | 12.752 | 1.46E-05 | 7.28E-05 | ACLF NS - HC; ACLF S - HC | | PE.18.2.22.5..H | 12.738 | 1.47E-05 | 7.28E-05 | HC - ACLF NS; HC - ACLF S | | DAG.18.2.22.5..NH4 | 12.736 | 1.48E-05 | 7.28E-05 | ACLF NS - HC; ACLF S - HC | | DAG.14.0.18.1..NH4 | 12.671 | 1.55E-05 | 7.59E-05 | ACLF NS - HC; ACLF S - HC | | PE.P.18.1.22.4..H | 12.632 | 1.60E-05 | 7.76E-05 | HC - ACLF NS; HC - ACLF S | | PE.18.0.20.1..H | 12.499 | 1.77E-05 | 8.53E-05 | ACLF NS - HC; ACLF S - HC | | LPC.20.1..AcO | 12.307 | 2.05E-05 | 9.82E-05 | HC - ACLF NS; HC - ACLF S | | PA.18.0.20.4..H | 12.235 | 2.17E-05 | 0.0001027 | HC - ACLF NS; HC - ACLF S | | TAG.42.0.FA14.0..NH4 | 12.227 | 2.19E-05 | 0.0001027 | ACLF NS - HC; ACLF S - HC | | PE.18.0.20.5..H | 12.22 | 2.20E-05 | 0.0001027 | HC - ACLF NS; HC - ACLF S | | CER.24.0..H | 12.191 | 2.25E-05 | 0.0001043 | HC - ACLF NS; HC - ACLF S | | DAG.18.1.20.5..NH4 | 12.162 | 2.30E-05 | 0.0001059 | ACLF NS - HC; ACLF S - HC | | TAG.42.1.FA18.1..NH4 | 12.149 | 2.32E-05 | 0.0001062 | ACLF NS - HC; ACLF S - HC | | DAG.16.1.18.2..NH4 | 12.118 | 2.38E-05 | 0.0001081 | ACLF NS - HC; ACLF S - HC | | PC.20.0.16.1..AcO | 12.106 | 2.40E-05 | 0.0001082 | ACLF NS - ACLF S; ACLF NS - HC; ACLF S - HC | | DAG.16.1.18.0..NH4 | 12.058 | 2.49E-05 | 0.0001116 | ACLF NS - HC; ACLF S - HC | | TAG.46.1.FA16.0..NH4 | 11.998 | 2.61E-05 | 0.000116 | ACLF NS - HC; ACLF S - HC | | DAG.18.1.20.1..NH4 | 11.792 | 3.06E-05 | 0.0001344 | ACLF NS - HC; ACLF S - HC | | PE.P.16.0.20.1..H | 11.663 | 3.39E-05 | 0.0001477 | HC - ACLF NS; HC - ACLF S | | DAG.18.0.22.6..NH4 | 11.548 | 3.71E-05 | 0.0001604 | ACLF NS - HC; ACLF S - HC | | TAG.45.1.FA16.0..NH4 | 11.401 | 4.16E-05 | 0.0001779 | ACLF NS - HC; ACLF S - HC | | TAG.45.1.FA18.1..NH4 | 11.4 | 4.17E-05 | 0.0001779 | ACLF NS - HC; ACLF S - HC | | DAG.18.1.20.3..NH4 | 11.332 | 4.39E-05 | 0.0001851 | ACLF NS - HC; ACLF S - HC | | LPG.18.2..H | 11.199 | 4.88E-05 | 0.0002043 | ACLF NS - HC; ACLF S - HC | | PE.18.0.18.2..H | 11.128 | 5.16E-05 | 0.0002146 | ACLF NS - HC; ACLF S - HC | | DAG.16.1.20.4..NH4 | 11.072 | 5.40E-05 | 0.000222 | ACLF NS - HC; ACLF S - HC | | CE.16.1..H | 11.069 | 5.41E-05 | 0.000222 | ACLF S - ACLF NS; ACLF NS - HC; ACLF S - HC | | TAG.44.2.FA16.0..NH4 | 10.908 | 6.15E-05 | 0.0002506 | ACLF NS - HC; ACLF S - HC | | PA.16.0.18.3..H | 10.805 | 6.67E-05 | 0.0002686 | ACLF NS - HC; ACLF S - HC | | DAG.18.1.20.2..NH4 | 10.749 | 6.98E-05 | 0.000279 | ACLF NS - HC; ACLF S - HC | | PE.16.0.18.1..H | 10.72 | 7.14E-05 | 0.0002837 | ACLF NS - HC; ACLF S - HC | | PE.P.16.0.20.5..H | 10.653 | 7.53E-05 | 0.0002973 | HC - ACLF NS; HC - ACLF S | | TAG.45.0.FA16.0..NH4 | 10.631 | 7.66E-05 | 0.0002995 | ACLF NS - HC; ACLF S - HC | | PG.18.1.22.5..H | 10.629 | 7.67E-05 | 0.0002995 | ACLF S - ACLF NS; HC - ACLF NS | | PA.18.0.22.6..H | 10.53 | 8.30E-05 | 0.000322 | HC - ACLF NS; HC - ACLF S | | DAG.18.2.22.4..NH4 | 10.439 | 8.93E-05 | 0.0003442 | ACLF S - ACLF NS; ACLF S - HC | | PC.18.0.22.5..AcO | 10.349 | 9.60E-05 | 0.0003679 | HC - ACLF NS; HC - ACLF S | | LPC.22.6..AcO | 10.339 | 9.68E-05 | 0.0003687 | ACLF NS - ACLF S; HC - ACLF S | | MAG.18.0..NH4 | 10.273 | 0.0001021 | 0.0003865 | ACLF NS - HC; ACLF S - HC | | DAG.16.0.18.2..NH4 | 10.074 | 0.0001198 | 0.0004507 | ACLF S - ACLF NS; ACLF S - HC | | MAG.20.2..NH4 | 10.012 | 0.000126 | 0.0004713 | ACLF NS - HC; ACLF S - HC | | LPI.20.0..H | 9.9993 | 0.0001272 | 0.0004732 | ACLF NS - HC; ACLF S - HC | | PE.O.18.0.18.0..H | 9.9759 | 0.0001297 | 0.0004794 | ACLF NS - HC; ACLF S - HC | | PE.14.0.16.1..H | 9.9426 | 0.0001332 | 0.0004897 | ACLF NS - HC; ACLF S - HC | | PE.18.1.20.5..H | 9.8358 | 0.0001452 | 0.0005308 | HC - ACLF NS; HC - ACLF S | | PE.16.0.20.5..H | 9.7419 | 0.0001567 | 0.0005695 | HC - ACLF NS; HC - ACLF S | | PE.P.16.0.16.0..H | 9.6657 | 0.0001667 | 0.0006024 | ACLF NS - HC; ACLF S - HC | | DAG.18.1.18.2..NH4 | 9.6278 | 0.0001719 | 0.0006178 | ACLF NS - HC; ACLF S - HC | | LPG.20.0..H | 9.5919 | 0.000177 | 0.0006325 | ACLF NS - ACLF S; ACLF NS - HC; ACLF S - HC | | PE.P.18.0.20.1..H | 9.4991 | 0.0001909 | 0.0006784 | ACLF S - ACLF NS; HC - ACLF NS | | PE.P.16.0.20.2..H | 9.459 | 0.0001973 | 0.0006971 | HC - ACLF NS; HC - ACLF S | | LPI.22.4..H | 9.4463 | 0.0001993 | 0.0007004 | ACLF NS - HC; ACLF S - HC | | TAG.44.0.FA18.0..NH4 | 9.3477 | 0.0002161 | 0.000755 | ACLF NS - HC; ACLF S - HC | | LPE.16.1..H | 9.2441 | 0.0002352 | 0.0008174 | HC - ACLF NS; HC - ACLF S | | DCER.22.1..H | 9.0783 | 0.0002695 | 0.0009315 | HC - ACLF NS; HC - ACLF S | | PE.18.0.22.5..H | 8.9884 | 0.0002902 | 0.000994 | HC - ACLF NS; HC - ACLF S | | TAG.40.0.FA16.0..NH4 | 8.9862 | 0.0002907 | 0.000994 | ACLF NS - HC; ACLF S - HC | | DAG.18.1.22.4..NH4 | 8.9 | 0.0003121 | 0.0010559 | ACLF NS - HC; ACLF S - HC | | PI.16.0.20.4..H | 8.7343 | 0.0003579 | 0.0012045 | HC - ACLF NS; HC - ACLF S | | DAG.14.0.22.6..NH4 | 8.6378 | 0.0003877 | 0.0012978 | ACLF NS - HC; ACLF S - HC | | PC.16.0.14.0..AcO | 8.6176 | 0.0003943 | 0.0013119 | ACLF NS - HC; ACLF S - HC | | PC.18.0.20.0..AcO | 8.6122 | 0.0003961 | 0.0013119 | ACLF NS - HC; ACLF S - HC | | PS.18.1.16.1..H | 8.5872 | 0.0004043 | 0.0013324 | ACLF NS - HC; ACLF S - HC | | PI.16.0.20.3..H | 8.1281 | 0.000593 | 0.0019341 | HC - ACLF NS; HC - ACLF S | | DAG.16.0.22.5..NH4 | 8.0219 | 0.0006482 | 0.0021034 | ACLF NS - HC; ACLF S - HC | | DCER.18.1..H | 8.0061 | 0.0006569 | 0.0021101 | ACLF NS - ACLF S; ACLF NS - HC | | PS.16.0.18.0..H | 7.9396 | 0.0006947 | 0.0022202 | ACLF NS - HC; ACLF S - HC | | TAG.42.1.FA16.1..NH4 | 7.8094 | 0.0007752 | 0.0024651 | ACLF NS - HC; ACLF S - HC | | PE.18.1.22.4..H | 7.787 | 0.00079 | 0.0024996 | HC - ACLF NS; HC - ACLF S | | PI.16.0.18.3..H | 7.7226 | 0.0008341 | 0.0026261 | ACLF NS - HC; ACLF S - HC | | PA.16.0.20.1..H | 7.6689 | 0.0008728 | 0.0027345 | ACLF NS - HC; ACLF S - HC | | PA.14.0.20.1..H | 7.5868 | 0.0009356 | 0.0029169 | ACLF NS - HC; ACLF S - HC | | PE.O.16.0.18.0..H | 7.5722 | 0.0009473 | 0.0029388 | ACLF NS - HC; ACLF S - HC | | PA.20.0.20.2..H | 7.5243 | 0.0009865 | 0.0030456 | HC - ACLF NS; HC - ACLF S | | PC.16.0.22.5..AcO | 7.4461 | 0.0010542 | 0.0032391 | HC - ACLF NS; HC - ACLF S | | DAG.18.2.20.3..NH4 | 7.4095 | 0.0010875 | 0.0033253 | ACLF NS - HC; ACLF S - HC | | PC.18.0.20.2..AcO | 7.3763 | 0.0011187 | 0.0034004 | HC - ACLF NS; HC - ACLF S | | PA.16.0.22.6..H | 7.372 | 0.0011228 | 0.0034004 | ACLF NS - HC; ACLF S - HC | | PA.18.0.20.2..H | 7.3651 | 0.0011294 | 0.0034042 | ACLF S - ACLF NS; HC - ACLF NS | | SM.16.0..H | 7.3535 | 0.0011406 | 0.0034218 | ACLF NS - HC; ACLF S - HC | | PS.16.0.20.1..H | 7.1912 | 0.0013097 | 0.0039107 | ACLF NS - HC; ACLF S - HC | | DAG.18.2.20.5..NH4 | 7.0068 | 0.0015335 | 0.0045576 | ACLF NS - HC; ACLF S - HC | | PE.P.18.1.20.1..H | 6.9087 | 0.0016682 | 0.0049281 | HC - ACLF NS; HC - ACLF S | | DAG.16.0.20.5..NH4 | 6.9049 | 0.0016737 | 0.0049281 | ACLF NS - HC; ACLF S - HC | | LPE.18.0..H | 6.8712 | 0.0017228 | 0.0050494 | HC - ACLF NS; HC - ACLF S | | CE.20.2..H | 6.7953 | 0.0018391 | 0.0053654 | ACLF NS - HC; ACLF S - HC | | PC.14.0.20.4..AcO | 6.7674 | 0.0018838 | 0.0054708 | HC - ACLF NS; HC - ACLF S | | TAG.54.1.FA18.0..NH4 | 6.6859 | 0.0020209 | 0.0058423 | ACLF NS - ACLF S; ACLF NS - HC | | TAG.52.0.FA20.0..NH4 | 6.6796 | 0.0020319 | 0.0058476 | ACLF NS - ACLF S; ACLF NS - HC | | PC.16.0.20.2..AcO | 6.6484 | 0.0020873 | 0.0059797 | HC - ACLF NS; HC - ACLF S | | PE.18.1.22.5..H | 6.6121 | 0.0021538 | 0.0061426 | HC - ACLF NS; HC - ACLF S | | PC.14.0.20.3..AcO | 6.5791 | 0.0022161 | 0.0062642 | HC - ACLF NS; HC - ACLF S | | PE.O.18.0.20.2..H | 6.5663 | 0.0022407 | 0.0063058 | ACLF NS - ACLF S; ACLF NS - HC | | DAG.18.2.18.3..NH4 | 6.5355 | 0.0023014 | 0.0064479 | ACLF NS - HC; ACLF S - HC | | TAG.50.3.FA18.1..NH4 | 6.4358 | 0.002509 | 0.0069987 | ACLF NS - ACLF S; ACLF NS - HC | | TAG.52.5.FA18.2..NH4 | 6.357 | 0.0026865 | 0.0074613 | ACLF NS - ACLF S; ACLF NS - HC | | PS.18.0.20.2..H | 6.3338 | 0.0027412 | 0.0075799 | ACLF NS - HC; ACLF S - HC | | PE.O.18.0.22.5..H | 6.237 | 0.0029819 | 0.00821 | HC - ACLF NS; HC - ACLF S | | PE.P.18.1.20.2..H | 6.2231 | 0.0030182 | 0.0082739 | HC - ACLF NS; HC - ACLF S | | PC.16.0.20.4..AcO | 6.1853 | 0.0031193 | 0.0085145 | ACLF S - ACLF NS; HC - ACLF NS | | PE.18.2.18.3..H | 6.1779 | 0.0031395 | 0.008533 | HC - ACLF NS; HC - ACLF S | | SM.20.1..H | 6.1452 | 0.0032303 | 0.0087425 | HC - ACLF NS; HC - ACLF S | | DAG.18.0.18.3..NH4 | 6.0313 | 0.0035682 | 0.009616 | ACLF NS - HC; ACLF S - HC | | PA.18.0.20.0..H | 6.0051 | 0.0036508 | 0.0097971 | ACLF S - HC | | TAG.46.0.FA18.0..NH4 | 5.9982 | 0.0036731 | 0.0098154 | ACLF NS - HC; ACLF S - HC | | PS.20.0.22.5..H | 5.9699 | 0.0037651 | 0.010019 | HC - ACLF NS; HC - ACLF S | | PE.P.16.0.22.6..H | 5.8783 | 0.0040799 | 0.010812 | ACLF S - ACLF NS; HC - ACLF NS | | TAG.42.2.FA18.2..NH4 | 5.8363 | 0.0042329 | 0.011171 | ACLF NS - HC; ACLF S - HC | | PE.O.18.0.22.6..H | 5.7889 | 0.0044131 | 0.011575 | HC - ACLF NS; HC - ACLF S | | PE.P.18.1.20.4..H | 5.7864 | 0.0044225 | 0.011575 | HC - ACLF NS | | PS.18.0.20.4..H | 5.7667 | 0.0045 | 0.011682 | HC - ACLF NS; HC - ACLF S | | PI.18.0.20.3..H | 5.754 | 0.0045507 | 0.011765 | HC - ACLF NS; HC - ACLF S | | MAG.22.0..NH4 | 5.668 | 0.0049085 | 0.012639 | ACLF NS - HC; ACLF S - HC | | TAG.45.0.FA14.0..NH4 | 5.6097 | 0.0051672 | 0.013251 | ACLF NS - HC; ACLF S - HC | | PE.18.1.20.2..H | 5.5849 | 0.0052814 | 0.01349 | ACLF NS - ACLF S; ACLF NS - HC | | PE.P.18.0.18.0..H | 5.526 | 0.0055634 | 0.014153 | ACLF S - ACLF NS; ACLF S - HC | | PE.P.16.0.18.2..H | 5.4929 | 0.0057287 | 0.014516 | HC - ACLF NS | | PE.P.18.1.18.2..H | 5.48 | 0.0057947 | 0.014625 | HC - ACLF NS | | DCER.14.0..H | 5.4391 | 0.0060081 | 0.015103 | ACLF S - ACLF NS; ACLF S - HC | | DAG.16.0.16.0..NH4 | 5.363 | 0.0064272 | 0.016093 | ACLF NS - HC; ACLF S - HC | | PE.16.0.22.4..H | 5.3535 | 0.0064819 | 0.016167 | HC - ACLF NS; HC - ACLF S | | DAG.14.0.16.1..NH4 | 5.3463 | 0.0065234 | 0.016207 | ACLF NS - HC; ACLF S - HC | | DCER.24.0..H | 5.3221 | 0.0066647 | 0.016493 | HC - ACLF NS; HC - ACLF S | | DAG.14.0.18.2..NH4 | 5.2876 | 0.0068722 | 0.016941 | ACLF NS - HC; ACLF S - HC | | PC.16.0.18.2..AcO | 5.2786 | 0.0069273 | 0.016987 | ACLF S - ACLF NS; ACLF S - HC | | PE.P.18.0.20.2..H | 5.2758 | 0.0069442 | 0.016987 | HC - ACLF NS | | PS.18.0.20.0..H | 5.2435 | 0.0071469 | 0.017406 | ACLF S - ACLF NS; HC - ACLF NS | | PE.O.16.0.20.1..H | 5.2398 | 0.0071702 | 0.017406 | HC - ACLF NS; HC - ACLF S | | DAG.14.0.20.0..NH4 | 5.2044 | 0.0073998 | 0.017895 | ACLF NS - HC | | PC.18.1.20.3..AcO | 5.1979 | 0.0074423 | 0.017929 | HC - ACLF NS; HC - ACLF S | | PA.16.0.22.5..H | 5.1475 | 0.0077839 | 0.018681 | ACLF NS - HC; ACLF S - HC | | PI.18.1.20.3..H | 5.134 | 0.007878 | 0.018836 | ACLF NS - ACLF S; HC - ACLF S | | TAG.58.3.FA18.1..NH4 | 5.0825 | 0.0082481 | 0.019647 | ACLF NS - ACLF S; ACLF NS - HC | | SM.26.1..H | 5.034 | 0.0086133 | 0.020439 | ACLF S - HC | | PE.18.0.22.4..H | 5.0299 | 0.0086449 | 0.020439 | HC - ACLF NS | | TAG.54.3.FA18.0..NH4 | 5.0218 | 0.0087073 | 0.020511 | ACLF NS - ACLF S; ACLF NS - HC | | PS.18.0.16.1..H | 5.0087 | 0.0088103 | 0.020643 | ACLF S - HC | | PE.O.18.0.20.1..H | 5.0064 | 0.0088282 | 0.020643 | ACLF NS - HC; ACLF S - HC | | PC.18.0.18.2..AcO | 4.9972 | 0.0089008 | 0.020736 | ACLF S - ACLF NS; ACLF S - HC | | PE.18.1.18.3..H | 4.9681 | 0.0091356 | 0.021205 | HC - ACLF NS; HC - ACLF S | | PA.16.0.18.0..H | 4.9576 | 0.0092222 | 0.021281 | ACLF S - HC | | MAG.22.3..NH4 | 4.956 | 0.0092351 | 0.021281 | ACLF NS - HC; ACLF S - HC | | PE.P.16.0.22.5..H | 4.9128 | 0.009599 | 0.022025 | HC - ACLF NS; HC - ACLF S | | PS.18.0.20.3..H | 4.9095 | 0.0096275 | 0.022025 | ACLF NS - ACLF S; HC - ACLF S | | PA.20.0.20.1..H | 4.8856 | 0.0098361 | 0.022422 | HC - ACLF NS | | PI.16.0.18.2..H | 4.8787 | 0.009897 | 0.02248 | HC - ACLF NS; HC - ACLF S | | PE.18.0.16.0..H | 4.8357 | 0.010286 | 0.023281 | ACLF S - HC | | PE.18.0.20.3..H | 4.7846 | 0.010768 | 0.024285 | HC - ACLF NS; HC - ACLF S | | PC.20.0.20.4..AcO | 4.7758 | 0.010854 | 0.024392 | ACLF NS - ACLF S | | LPS.16.0..H | 4.6442 | 0.012217 | 0.027358 | HC - ACLF NS; HC - ACLF S | | TAG.50.3.FA18.2..NH4 | 4.6223 | 0.012461 | 0.027807 | ACLF NS - HC | | LPI.22.5..H | 4.5381 | 0.013443 | 0.029895 | ACLF NS - HC; ACLF S - HC | | LPS.20.5..H | 4.53 | 0.013542 | 0.030009 | ACLF NS - HC | | DAG.18.1.18.1..NH4 | 4.5171 | 0.013701 | 0.030255 | ACLF S - HC | | TAG.50.2.FA14.0..NH4 | 4.498 | 0.013939 | 0.030675 | ACLF NS - HC | | PE.18.1.20.4..H | 4.4758 | 0.014221 | 0.031188 | HC - ACLF NS; HC - ACLF S | | PI.18.2.20.4..H | 4.4578 | 0.014454 | 0.03159 | ACLF NS - ACLF S; ACLF NS - HC | | PS.18.2.18.3..H | 4.4462 | 0.014607 | 0.031816 | HC - ACLF NS; HC - ACLF S | | PE.P.18.1.20.3..H | 4.4127 | 0.015057 | 0.032683 | HC - ACLF NS | | PC.16.0.18.3..AcO | 4.3988 | 0.015248 | 0.032984 | HC - ACLF NS; HC - ACLF S | | PE.18.0.14.0..H | 4.3709 | 0.015638 | 0.033714 | ACLF NS - HC; ACLF S - HC | | PS.18.0.22.5..H | 4.3079 | 0.016556 | 0.035572 | ACLF NS - HC | | PG.18.0.20.0..H | 4.2734 | 0.017082 | 0.036457 | ACLF S - HC | | PI.18.0.20.0..H | 4.2583 | 0.017318 | 0.036837 | HC - ACLF NS | | DAG.16.0.18.1..NH4 | 4.2536 | 0.017393 | 0.036873 | ACLF NS - HC; ACLF S - HC | | PE.O.16.0.18.1..H | 4.2392 | 0.017621 | 0.037233 | ACLF S - ACLF NS; HC - ACLF NS | | PI.14.0.18.1..H | 4.2161 | 0.017996 | 0.037898 | ACLF NS - HC; ACLF S - HC | | PS.14.0.20.2..H | 4.121 | 0.019621 | 0.041185 | ACLF NS - HC; ACLF S - HC | | TAG.52.2.FA18.2..NH4 | 4.0902 | 0.020179 | 0.042176 | ACLF NS - ACLF S; ACLF NS - HC | | DAG.16.1.20.0..NH4 | 4.0877 | 0.020226 | 0.042176 | ACLF S - HC | | PS.18.2.20.4..H | 4.068 | 0.020592 | 0.042785 | HC - ACLF NS; HC - ACLF S | | DCER.24.1..H | 4.0648 | 0.020652 | 0.042785 | HC - ACLF NS | | PC.16.0.22.4..AcO | 4.0519 | 0.020896 | 0.043148 | HC - ACLF NS | | PA.20.0.22.4..H | 4.0448 | 0.021032 | 0.043289 | HC - ACLF NS; HC - ACLF S | | DAG.18.1.20.4..NH4 | 4.0068 | 0.021774 | 0.044672 | ACLF S - HC | | TAG.50.1.FA14.0..NH4 | 3.9472 | 0.022992 | 0.04702 | ACLF NS - ACLF S; ACLF NS - HC | | PE.18.1.20.3..H | 3.9347 | 0.023258 | 0.04741 | HC - ACLF S | | TAG.54.6.FA18.2..NH4 | 3.914 | 0.023702 | 0.048161 | HC - ACLF NS; HC - ACLF S | | PA.18.1.22.6..H | 3.889 | 0.02425 | 0.049117 | ACLF NS - HC | | DAG.16.0.20.3..NH4 | 3.8787 | 0.024479 | 0.049424 | ACLF NS - HC; ACLF S - HC | | SM.24.1..H | 3.8748 | 0.024567 | 0.049446 | ACLF NS - HC; ACLF S - HC | |  |  |  |  |
| --- | --- | --- | --- | --- | --- | --- | --- | --- | --- | --- | --- | --- | --- | --- | --- | --- | --- | --- | --- | --- | --- | --- | --- | --- | --- | --- | --- | --- | --- | --- | --- | --- | --- | --- | --- | --- | --- | --- | --- | --- | --- | --- | --- | --- | --- | --- | --- | --- | --- | --- | --- | --- | --- | --- | --- | --- | --- | --- | --- | --- | --- | --- | --- | --- | --- | --- | --- | --- | --- | --- | --- | --- | --- | --- | --- | --- | --- | --- | --- | --- | --- | --- | --- | --- | --- | --- | --- | --- | --- | --- | --- | --- | --- | --- | --- | --- | --- | --- | --- | --- | --- | --- | --- | --- | --- | --- | --- | --- | --- | --- | --- | --- | --- | --- | --- | --- | --- | --- | --- | --- | --- | --- | --- | --- | --- | --- | --- | --- | --- | --- | --- | --- | --- | --- | --- | --- | --- | --- | --- | --- | --- | --- | --- | --- | --- | --- | --- | --- | --- | --- | --- | --- | --- | --- | --- | --- | --- | --- | --- | --- | --- | --- | --- | --- | --- | --- | --- | --- | --- | --- | --- | --- | --- | --- | --- | --- | --- | --- | --- | --- | --- | --- | --- | --- | --- | --- | --- | --- | --- | --- | --- | --- | --- | --- | --- | --- | --- | --- | --- | --- | --- | --- | --- | --- | --- | --- | --- | --- | --- | --- | --- | --- | --- | --- | --- | --- | --- | --- | --- | --- | --- | --- | --- | --- | --- | --- | --- | --- | --- | --- | --- | --- | --- | --- | --- | --- | --- | --- | --- | --- | --- | --- | --- | --- | --- | --- | --- | --- | --- | --- | --- | --- | --- | --- | --- | --- | --- | --- | --- | --- | --- | --- | --- | --- | --- | --- | --- | --- | --- | --- | --- | --- | --- | --- | --- | --- | --- | --- | --- | --- | --- | --- | --- | --- | --- | --- | --- | --- | --- | --- | --- | --- | --- | --- | --- | --- | --- | --- | --- | --- | --- | --- | --- | --- | --- | --- | --- | --- | --- | --- | --- | --- | --- | --- | --- | --- | --- | --- | --- | --- | --- | --- | --- | --- | --- | --- | --- | --- | --- | --- | --- | --- | --- | --- | --- | --- | --- | --- | --- | --- | --- | --- | --- | --- | --- | --- | --- | --- | --- | --- | --- | --- | --- | --- | --- | --- | --- | --- | --- | --- | --- | --- | --- | --- | --- | --- | --- | --- | --- | --- | --- | --- | --- | --- | --- | --- | --- | --- | --- | --- | --- | --- | --- | --- | --- | --- | --- | --- | --- | --- | --- | --- | --- | --- | --- | --- | --- | --- | --- | --- | --- | --- | --- | --- | --- | --- | --- | --- | --- | --- | --- | --- | --- | --- | --- | --- | --- | --- | --- | --- | --- | --- | --- | --- | --- | --- | --- | --- | --- | --- | --- | --- | --- | --- | --- | --- | --- | --- | --- | --- | --- | --- | --- | --- | --- | --- | --- | --- | --- | --- | --- | --- | --- | --- | --- | --- | --- | --- | --- | --- | --- | --- | --- | --- | --- | --- | --- | --- | --- | --- | --- | --- | --- | --- | --- | --- | --- | --- | --- | --- | --- | --- | --- | --- | --- | --- | --- | --- | --- | --- | --- | --- | --- | --- | --- | --- | --- | --- | --- | --- | --- | --- | --- | --- | --- | --- | --- | --- | --- | --- | --- | --- | --- | --- | --- | --- | --- | --- | --- | --- | --- | --- | --- | --- | --- | --- | --- | --- | --- | --- | --- | --- | --- | --- | --- | --- | --- | --- | --- | --- | --- | --- | --- | --- | --- | --- | --- | --- | --- | --- | --- | --- | --- | --- | --- | --- | --- | --- | --- | --- | --- | --- | --- | --- | --- | --- | --- | --- | --- | --- | --- | --- | --- | --- | --- | --- | --- | --- | --- | --- | --- | --- | --- | --- | --- | --- | --- | --- | --- | --- | --- | --- | --- | --- | --- | --- | --- | --- | --- | --- | --- | --- | --- | --- | --- | --- | --- | --- | --- | --- | --- | --- | --- | --- | --- | --- | --- | --- | --- | --- | --- | --- | --- | --- | --- | --- | --- | --- | --- | --- | --- | --- | --- | --- | --- | --- | --- | --- | --- | --- | --- | --- | --- | --- | --- | --- | --- | --- | --- | --- | --- | --- | --- | --- | --- | --- | --- | --- | --- | --- | --- | --- | --- | --- | --- | --- | --- | --- | --- | --- | --- | --- | --- | --- | --- | --- | --- | --- | --- | --- | --- | --- | --- | --- | --- | --- | --- | --- | --- | --- | --- | --- | --- | --- | --- | --- | --- | --- | --- | --- | --- | --- | --- | --- | --- | --- | --- | --- | --- | --- | --- | --- | --- | --- | --- | --- | --- | --- | --- | --- | --- | --- | --- | --- | --- | --- | --- | --- | --- | --- | --- | --- | --- | --- | --- | --- | --- | --- | --- | --- | --- | --- | --- | --- | --- | --- | --- | --- | --- | --- | --- | --- | --- | --- | --- | --- | --- | --- | --- | --- | --- | --- | --- | --- | --- | --- | --- | --- | --- | --- | --- | --- | --- | --- | --- | --- | --- | --- | --- | --- | --- | --- | --- | --- | --- | --- | --- | --- | --- | --- | --- | --- | --- | --- | --- | --- | --- | --- | --- | --- | --- | --- | --- | --- | --- | --- | --- | --- | --- | --- | --- | --- | --- | --- | --- | --- | --- | --- | --- | --- | --- | --- | --- | --- | --- | --- | --- | --- | --- | --- | --- | --- | --- | --- | --- | --- | --- | --- | --- | --- | --- | --- | --- | --- | --- | --- | --- | --- | --- | --- | --- | --- | --- | --- | --- | --- | --- | --- | --- | --- | --- | --- | --- | --- | --- | --- | --- | --- | --- | --- | --- | --- | --- | --- | --- | --- | --- | --- | --- | --- | --- | --- | --- | --- | --- | --- | --- | --- | --- | --- | --- | --- | --- | --- | --- | --- | --- | --- | --- | --- | --- | --- | --- | --- | --- | --- | --- | --- | --- | --- | --- | --- | --- | --- | --- | --- | --- | --- | --- | --- | --- | --- | --- | --- | --- | --- | --- | --- | --- | --- | --- | --- | --- | --- | --- | --- | --- | --- | --- | --- | --- | --- | --- | --- | --- | --- | --- | --- | --- | --- | --- | --- | --- | --- | --- | --- | --- | --- | --- | --- | --- | --- | --- | --- | --- | --- | --- | --- | --- | --- | --- | --- | --- | --- | --- | --- | --- | --- | --- | --- | --- | --- | --- | --- | --- | --- | --- | --- | --- | --- | --- | --- | --- | --- | --- | --- | --- | --- | --- | --- | --- | --- | --- | --- | --- | --- | --- | --- | --- | --- | --- | --- | --- | --- | --- | --- | --- | --- | --- | --- | --- | --- | --- | --- | --- | --- | --- | --- | --- | --- | --- | --- | --- | --- | --- | --- | --- | --- | --- | --- | --- | --- | --- | --- | --- | --- | --- | --- | --- | --- | --- | --- | --- | --- | --- | --- | --- | --- | --- | --- | --- | --- | --- | --- | --- | --- | --- | --- | --- | --- | --- | --- | --- | --- | --- | --- | --- | --- | --- | --- | --- | --- | --- | --- | --- | --- | --- | --- | --- | --- | --- | --- | --- | --- | --- | --- | --- | --- | --- | --- | --- | --- | --- | --- | --- | --- | --- | --- | --- | --- | --- | --- | --- | --- | --- | --- | --- | --- | --- | --- | --- | --- | --- | --- | --- | --- | --- | --- | --- | --- | --- | --- | --- | --- | --- | --- | --- | --- | --- | --- | --- | --- | --- | --- | --- | --- | --- | --- | --- | --- | --- | --- | --- | --- | --- | --- | --- | --- | --- | --- | --- | --- | --- | --- | --- | --- | --- | --- | --- | --- | --- | --- | --- | --- | --- | --- | --- | --- | --- | --- | --- | --- | --- | --- | --- | --- | --- | --- | --- | --- | --- | --- | --- | --- | --- | --- | --- | --- | --- | --- | --- | --- | --- | --- | --- | --- | --- | --- | --- | --- | --- | --- | --- | --- | --- | --- | --- | --- | --- | --- | --- | --- | --- | --- | --- | --- | --- | --- | --- | --- | --- | --- | --- | --- | --- | --- | --- | --- | --- | --- | --- | --- | --- | --- | --- | --- | --- | --- | --- | --- | --- | --- | --- | --- | --- | --- | --- | --- | --- | --- | --- | --- | --- | --- | --- | --- | --- | --- | --- | --- | --- | --- | --- | --- | --- | --- | --- | --- | --- | --- | --- | --- | --- | --- | --- | --- | --- | --- | --- | --- | --- | --- | --- | --- | --- | --- | --- | --- | --- | --- | --- | --- | --- | --- | --- | --- | --- | --- | --- | --- | --- | --- | --- | --- | --- | --- | --- | --- | --- | --- | --- | --- | --- | --- | --- | --- | --- | --- | --- | --- | --- | --- | --- | --- | --- | --- | --- | --- | --- | --- | --- | --- | --- | --- | --- | --- | --- | --- | --- | --- | --- | --- | --- | --- | --- | --- | --- | --- | --- | --- | --- | --- | --- | --- | --- | --- | --- | --- | --- | --- | --- | --- | --- | --- | --- | --- | --- | --- | --- | --- | --- | --- | --- | --- | --- | --- | --- | --- | --- | --- | --- | --- | --- | --- | --- | --- | --- | --- | --- | --- | --- | --- | --- | --- | --- | --- | --- | --- | --- | --- | --- | --- | --- | --- | --- | --- | --- | --- | --- | --- | --- | --- | --- | --- | --- | --- | --- | --- | --- | --- | --- | --- | --- | --- | --- | --- | --- | --- | --- | --- | --- | --- | --- | --- | --- | --- | --- | --- | --- | --- | --- | --- | --- | --- | --- | --- | --- | --- | --- | --- | --- | --- | --- | --- | --- | --- | --- | --- | --- | --- | --- | --- | --- | --- | --- | --- | --- | --- | --- | --- | --- | --- | --- | --- | --- | --- | --- | --- | --- | --- | --- | --- | --- | --- | --- | --- | --- | --- | --- | --- | --- | --- | --- | --- | --- | --- | --- | --- | --- | --- | --- | --- | --- | --- | --- | --- | --- | --- | --- | --- | --- | --- | --- | --- | --- | --- | --- | --- | --- | --- | --- | --- | --- | --- | --- | --- | --- | --- | --- | --- | --- | --- | --- | --- | --- | --- | --- | --- | --- | --- | --- | --- | --- | --- | --- | --- | --- | --- | --- | --- | --- | --- | --- | --- | --- | --- | --- | --- | --- | --- | --- | --- | --- | --- | --- | --- | --- | --- | --- | --- | --- | --- | --- | --- | --- | --- | --- | --- | --- |
|  |  |  |  |  |
|  |  |  |  |  |
|  |  |  |  |  |
