# Supplementary material for: Circulating Lipids Predict Mortality and Drive Immune Gene Regulation in Acute-on-Chronic Liver Failure
Source: Research Square preprint supplement (doi:10.21203/rs.3.rs-8154019/v1), 2025-12-02
Supplement: Supplementary file 8 [file 53377b3f0bd4ac3208c4ac67.docx]

**Supplementary Figure S3**

**Overlapping lipid signatures in ACLF and other acute diseases**

A. Venn diagram of 59 lipid species common to ACLF 1 (this study) and ACLF 2 (Clària et al. 2021), with the inset listing all overlapping lipids.
B. Venn diagram of the five lipids shared between ACLF 1 and sepsis (Mecatti et al. 2020), naming PC (34:1), PC (34:2), PC (36:1), PC (36:3) and PS (40:1).
C. Venn diagram of the 56 species common to ACLF 1 and severe COVID‑19 (Ciccarelli et al. 2022), with the inset enumerating all shared DG, LPC, LPE, PC, PE, PI and CE species.
D. Venn diagram of the 19 overlapping lipids between ACLF 1 and trauma (Wu et al. 2022), listing the shared PCs, PEs and PIs.


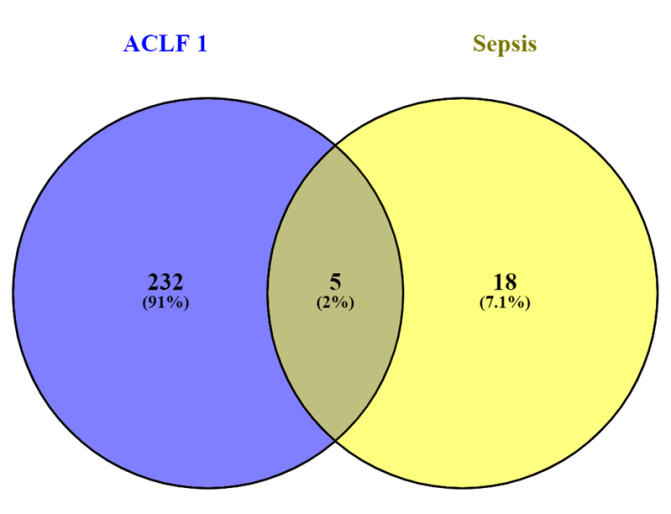

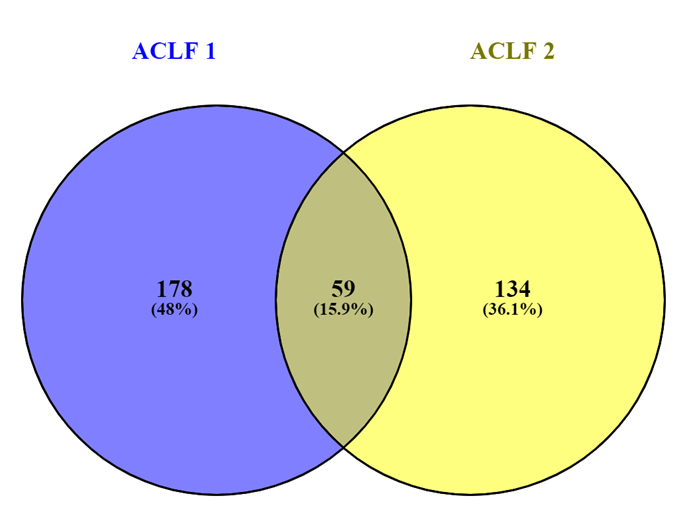


**59 common lipids in "ACLF 1" and "ACLF 2"** **5 common lipids in "ACLF 1" and "Sepsis":**

TG (40:0) LPC (18:0) PE (36:2) PC (34:1), PC (34:2), PC (36:3), PC (36:1), PS (40:1)

TG (46:1) LPC (22:6) PE (36:4)

TG (48:1) LPE (18:0) PE (36:5)

TG (50:1) LPE (18:2) PE (38:4)

TG (50:3) LPE (20:4) PE (38:5)

TG (51:2) PC (32:1) PE (38:6)

TG (52:2) PC (32:2) PE (38:7)

TG (52:3) PC (34:3) PE (40:6)

TG (52:4) PC (34:1) PE (40:7)

TG (52:5) PC (36:3) PI (32:1)

TG (54:3) PC (36:2) PI (34:1)

TG (54:6) PC (36:4) PI (36:1)

TG (54:7) PC (36:5) PI (36:3)

CE (20:4) PC (38:4) PI (36:4)

LPC (14:0) PC (38:1) PI (38:4)

LPC (16:1) PC (38:5) PI (40:6)

LPC (16:0) PC (40:4) PS (36:3)

LPC (18:1) PC (40:5) PS (36:1)

LPC (18:2) PE (34:2) PS (38:0)

PS (38:4)

PS (40:6


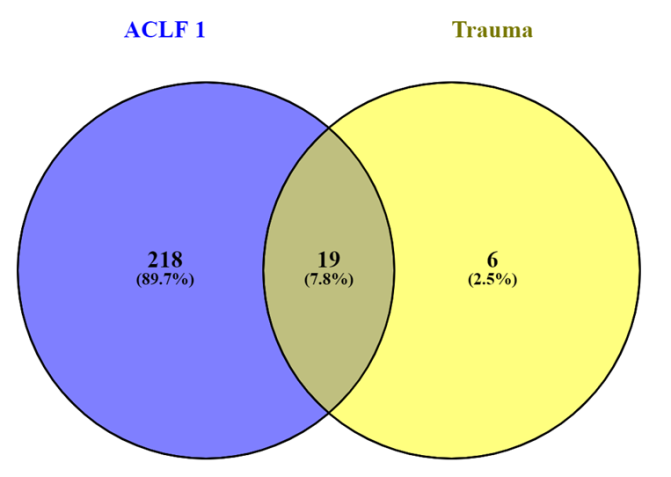


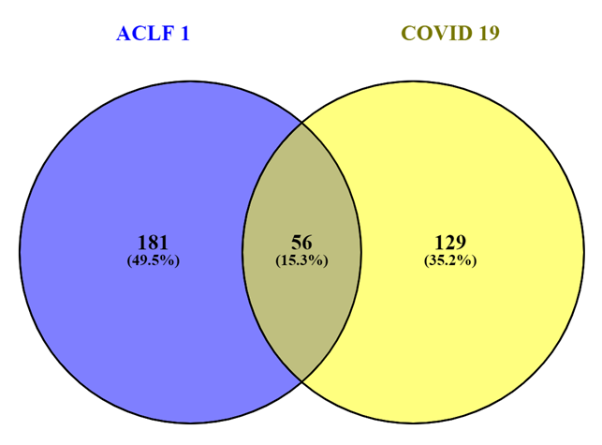


**56 common lipids in "ACLF 1" and "COVID 19":**

**19 common lipids in "ACLF 1" and "Trauma":**

PC (32:1)

PC (34:1)

PC (34:2)

PC (36:2)

PC (36:3)

PC (36:4)

PC (38:4)

PC (40:6)

PC (40:7)

PC (36:1)

PE (36:1)

PE (36:2)

PE (36:4)

PE (38:4)

PE (38:6)

PE (40:6)

PE (34:2)

PI (36:2)

PI (40:4)

CE (20:4) LPE (16:0) PC (40:7)

DG (34:2) LPE (18:0) PC (40:8)

DG (36:1) LPE (18:1) PE (36:5)

DG (36:2) LPE (18:2) PE (36:3)

DG (38:4) LPE (20:4) PE (36:4)

DG (40:8) LPE (22:6) PE (38:5)

LPC (14:0) PC (32:1) PE (40:6)

LPC (16:0) PC (32:2) PE (40:7)

LPC (16:1) PC (34:1) PE (34:1)

LPC (18:0) PC (34:2) PE (34:2)

LPC (18:1) PC (34:4) PI (32:1)

LPC (18:2) PC (34:0) PI (36:1)

LPC (20:1) PC (36:2) PI (36:2)

LPC (20:2) PC (36:3) PI (36:3)

LPC (20:3) PC (38:4) PI (36:4)

LPC (20:4) PC (38:5) PI (38:4)

LPC (22:4) PC (38:6) PI (38:3)

LPC (22:5) PC (36:0) PI (40:6)

LPC (22:6) PC (40:5)
