# Supplementary material for: Circulating Lipids Predict Mortality and Drive Immune Gene Regulation in Acute-on-Chronic Liver Failure
Source: Research Square preprint supplement (doi:10.21203/rs.3.rs-8154019/v1), 2025-12-02
Supplement: Supplementary file 9 [file 6883aed367f2b27765405591.docx]

**Supplementary Table S8**

PPARG Promoter Analysis

| Gene | PPARG Binding Position (bp) | Relative to TSS | p-value | Adjacent Elements | Biological Implication |
| --- | --- | --- | --- | --- | --- |
| MT3 | –464 | Upstream | 0.001 | — | PPARG may activate MT3 in lipid stress |
| MT2A | –465 | Upstream | 0.001 | — | PPARG may coordinate MT2A induction |
| MT1A | –790 | Upstream | 0.001 | — | More distal regulation; still relevant |
| CD177 | –909, –612 | Upstream | 0.001 | GC box, CCAAT box | likely lipid regulation |
| MAPK1 | –609 | Upstream | 0.001 | GC box | Lipid-responsive + constitutive regulation via Sp1 |
| MAPK14 | –846 | Upstream | 0.001 | Initiator element (Inr) | May be regulated in a PPARG-dependent, TATA-less manner |
| | FFAR3 | | --- |  |  | | --- |  |  | | --- | | | –865,  –651 | | --- | | Upstream | | 0.001 | | --- | | CCAAT box, GC box (near –651) | Strong lipid regulation potential; FFAR3 is a known fatty acid sensor |

Promoter analysis revealed PPARG binding motifs within the transcription start sites of all three metallothioneins, both MAPKs, FFAR3 and CD177 further supporting the idea that PPARG may orchestrate a broader cellular response involving both inflammatory and detoxification pathways in the context of lipid dysregulation.
