# Supplementary material for: Circulating Lipids Predict Mortality and Drive Immune Gene Regulation in Acute-on-Chronic Liver Failure
Source: Research Square preprint supplement (doi:10.21203/rs.3.rs-8154019/v1), 2025-12-02
Supplement: Supplementary file 10 [file 6d163a95818c1fa10d0bdfc8.docx]

**Supplementary Table S5**

*Pairwise comparisons of AUC for plasma lipids and clinical scores using DeLong's Test, of those parameters with AUC>0.7*

|  | **AUC Difference** | **95% CI** | | **z** | **p** |
| --- | --- | --- | --- | --- | --- |
| **Lower** | **Upper** |
| LPE(18:2) vs. LPE(20:4) | -0.021 | -0.139 | 0.097 | -0.356 | 0.722 |
| LPE(18:2) vs. Pred. Mortality (Logit) | -0.205 | -0.341 | -0.069 | -2.945 | **0.003** |
| LPE(18:2) vs. CTP | -0.035 | -0.190 | 0.119 | -0.446 | 0.656 |
| LPE(18:2) vs. TLC | 0.005 | -0.191 | 0.201 | 0.054 | 0.957 |
| LPE(18:2) vs. MELD-NA | -0.021 | -0.182 | 0.139 | -0.262 | 0.793 |
| LPE(20:4) vs. Pred. Mortality (Logit) | -0.183 | -0.311 | -0.056 | -2.817 | **0.005** |
| LPE(20:4) vs. CTP | -0.014 | -0.150 | 0.122 | -0.198 | 0.843 |
| LPE(20:4) vs. TLC | 0.027 | -0.158 | 0.211 | 0.285 | 0.776 |
| LPE(20:4) vs. MELD-NA | 0.000 | -0.175 | 0.175 | 0.000 | 1.000 |
| Pred. Mortality (Logit) vs. CTP | 0.170 | 0.050 | 0.290 | 2.771 | **0.006** |
| Pred. Mortality (Logit) vs. TLC | 0.210 | 0.062 | 0.358 | 2.780 | **0.005** |
| Pred. Mortality (Logit) vs. MELD-NA | 0.183 | 0.053 | 0.313 | 2.762 | **0.006** |
| CTP vs. TLC | 0.040 | -0.133 | 0.214 | 0.458 | 0.647 |
| CTP vs. MELD-NA | 0.014 | -0.166 | 0.194 | 0.149 | 0.881 |
| TLC vs. MELD-NA | -0.027 | -0.198 | 0.144 | -0.307 | 0.759 |
