# Supplementary material for: Circulating Lipids Predict Mortality and Drive Immune Gene Regulation in Acute-on-Chronic Liver Failure
Source: Research Square preprint supplement (doi:10.21203/rs.3.rs-8154019/v1), 2025-12-02
Supplement: Supplementary file 12 [file 7ecf5fba831655820a6e92b7.docx]

**Supplementary Table S7**

**Overlapping kinases and transcription factor analysis**

| ***KINASES*** | | |
| --- | --- | --- |
| ***Gene Symbol*** | ***log2 FoldChange*** | ***pValue*** |
| BMX | 3.5254 | 0.0005 |
| MAP2K6 | 2.4932 | 0.0003 |
| MAPK14 | 2.3317 | 0.0006 |
| FLT3 | 2.1775 | 0.0428 |
| MKNK1 | 1.9173 | 0.0027 |
| PIM3 | 1.6428 | 0.0043 |
| EPHB2 | 1.5821 | 0.0435 |
| JAK2 | 1.3919 | 0.0364 |
| CSNK1D | 1.2799 | 0.0397 |
| MAPK1 | 1.2708 | 0.0250 |
| PRKCD | 1.1306 | 0.0472 |
| PKMYT1 | 1.0942 | 0.0218 |
| RPS6KA4 | -1.1662 | 0.0376 |
| CDK20 | -1.3790 | 0.0066 |
| ATR | -1.5397 | 0.0178 |
| EP400 | -1.5698 | 0.0289 |
| MAP3K14 | -1.5856 | 0.0061 |
| CDK4 | -1.8728 | 0.0207 |
| RPS6KA5 | -2.0975 | 0.0363 |
| WEE1 | -2.5150 | 0.0045 |
| CDK6 | -2.5890 | 0.0013 |
| PRKCA | -2.6448 | 0.0108 |
| MYLK | -2.9900 | 0.0000 |
| FYN | -3.2223 | 0.0010 |
| DYRK2 | -3.3478 | 0.0002 |
| CAMK4 | -3.7623 | 0.0000 |
| PRKCQ | -4.2271 | 0.0000 |

**Differentially expressed genes (DEGs) (*Saha et al 2021, previous study*)**

| ***TRANSCRIPTION FACTORS*** | | |
| --- | --- | --- |
| ***Gene Symbol*** | ***log2 FoldChange*** | ***pValue*** |
| PPARG | 2.44270 | 0.00260 |
| CEBPD | 1.75950 | 0.00612 |
| SPI1 | 1.40630 | 0.02449 |
| CEBPB | 1.34920 | 0.03431 |
| KAT2A | -1.45860 | 0.01810 |
| GATA1 | -1.61550 | 0.03617 |
| ETS1 | -2.14590 | 0.00231 |
| IRF8 | -2.29330 | 0.01063 |
| TCF3 | -2.66230 | 0.00101 |
| MYC | -2.66890 | 0.00071 |
| GATA2 | -3.23970 | 0.00002 |

**Differentially expressed proteins (DEPs) (*Current study*)**

| ***KINASES*** | | |
| --- | --- | --- |
| ***Gene Symbol*** | ***log2 FoldChange*** | ***pValue*** |
| PRKCB | 2.955831 | 0.002527 |
| MAP2K1 | 2.880551 | 0.032798 |
| MAPK3 | 2.681013 | 0.006473 |
| MAPK14 | 2.313016 | 0.027057 |
| CSK | 1.609799 | 0.066673 |
| HCK | 1.600618 | 0.026705 |
| MAPK1 | 1.508031 | 0.013738 |
| PCNA | 1.238836 | 0.035156 |
| PRKCD | 1.018335 | 0.074849 |
| LYN | 0.909763 | 0.116935 |
| PRKDC | 0.20606 | 0.706234 |
| PRKAA1 | -0.00634 | 0.990451 |
| PRKACA | -1.14306 | 0.146798 |
| CSNK2A1 | -2.03481 | 0.0381 |

| ***TRANSCRIPTION FACTORS*** | | |
| --- | --- | --- |
| ***Gene Symbol*** | ***log2 FoldChange*** | ***pValue*** |
| STAT3 | 2.087953 | 0.008483 |
| CBX3 | 1.426129 | 0.027373 |
| SMC3 | 0.959168 | 0.351573 |
| UBTF | -0.43124 | 0.759828 |
| CREB1 | -0.53768 | 0.618773 |
| ZNF384 | -0.80605 | 0.573015 |
| NRF1 | -3.69841 | 0.000949 |
