# Supplementary material for: Circulating Lipids Predict Mortality and Drive Immune Gene Regulation in Acute-on-Chronic Liver Failure
Source: Research Square preprint supplement (doi:10.21203/rs.3.rs-8154019/v1), 2025-12-02
Supplement: Supplementary file 13 [file 8f9b66afbfcc18be43ab3e5e.docx]

**Supplementary Table S1**

Baseline characteristics of ACLF patients in the lipidomics cohort

| Derivation Cohort | Survivor | | Non-survivor | | p-value (2-tailed) |
| --- | --- | --- | --- | --- | --- |
| Mean±SD | Median (Q1-Q3) | Mean±SD | Median (Q1-Q3) |
| Age | 41±11 | 39 (33-47) | 37±11 | 35 (31-44) | 0.189 |
| **TLC** | 9960±5878 | 8525 (5650-14140) | 16323±10372 | 13295 (9200-20350) | **0.007** |
| Platelet x1000 | 114±63 | 98 (73-180) | 103±71 | 94 (58-122) | 0.544 |
| **INR** | 2.24±0.60 | 2.40 (1.83-2.40) | 3.46±3.01 | 2.83 (2.19-3.78) | **0.044** |
| **Urea** | 58.0±46.1 | 52.5 (22.0-80.0) | 96.7±64.7 | 71.5 (45.0-156.5) | **0.012** |
| **Creatinine** | 1.54±1.00 | 1.15 (0.90-2.10) | 2.89±2.72 | 1.95 (1.00-3.55) | **0.019** |
| Sodium | 138±6 | 137 (134-141) | 134±11 | 134 (129-143) | 0.157 |
| Potassium | 3.97±0.86 | 4.00 (3.30-4.60) | 4.39±1.05 | 4.30 (3.60-5.10) | 0.098 |
| Bilirubin | 19.26±31.04 | 15.15 (5.00-18.90) | 18.80±11.50 | 16.50 (8.95-24.60) | 0.941 |
| AST | 293.8±933.0 | 112.5 (54.0-178.0) | 200.6±232.4 | 121.5 (74.0-201.0) | 0.610 |
| ALT | 97±200 | 43 (30-90) | 102±169 | 46 (35-71) | 0.911 |
| SAP | 165.1±31.8 | 166.3 (143.0-184.0) | 173.0±34.4 | 167.3 (147.0-198.0) | 0.366 |
| Albumin | 3.02±0.95 | 2.85 (2.50-3.30) | 2.63±0.53 | 2.50 (2.30-2.90) | 0.060 |
| **MELD** | 29.59±6.42 | 31.62 (24.01-32.73) | 33.58±6.21 | 34.84 (28.46-40.00) | **0.020** |
| **MELD_Na** | 30.30±5.99 | 32.48 (25.00-33.24) | 34.78±5.08 | 35.59 (30.35-40.00) | **0.003** |
| **CTP** | 11±2 | 12 (10-12) | 13±2 | 13 (11-14) | **0.001** |
