# Supplementary material for: Circulating Lipids Predict Mortality and Drive Immune Gene Regulation in Acute-on-Chronic Liver Failure
Source: Research Square preprint supplement (doi:10.21203/rs.3.rs-8154019/v1), 2025-12-02
Supplement: Supplementary file 14 [file 9d3275cf97c3553a7f701745.docx]

**Supplementary Table S10**

Molecular Docking Results of 82 ACLF-Associated Lipids with PPARγ

Using the GA-Bound Co-Crystal Structure (PDB: 7AWD). Docking analysis was performed using the X-ray co-crystal structure of PPARγ in complex with garcinoic acid (GA). The 82 lipid species were identified from lipidomic profiling of ACLF samples. For ligands that could not be docked successfully due to poor in silico results in Schrödinger, the docking score is indicated as “Skip”.

| ID_Lab | HMDB_ID | Docking score |
| --- | --- | --- |
| GA | HMDB0001592 | -10.24 |
| L26 | LMGP06010854 | -10.7605 |
| L9B | HMDB0011525 | -9.42437 |
| L25 | LMGP02030129 | -9.36291 |
| L9D | HMDB0011495 | -8.91725 |
| L27 | LMGP06010966 | -8.86253 |
| L9A | HMDB0011524 | -8.84684 |
| L9C | HMDB0011494 | -8.64262 |
| L7C | HMDB0011507 | -8.5709 |
| L8A | HMDB0011518 | -8.54978 |
| L8B | HMDB0011517 | -8.54365 |
| L11B | HMDB0114771 | -8.46439 |
| L8C | HMDB0011488 | -7.93375 |
| L8D | HMDB0011487 | -7.79704 |
| L1 | HMDB0006728 | -7.49065 |
| L21A | LMGP02020098 | -7.22179 |
| L16B | HMDB0286057 | -7.193 |
| L2D | HMDB0055968 | -7.05488 |
| L29 | LMGP03010951 | -7.05488 |
| L4F | HMDB0295579 | -6.73191 |
| L7B | HMDB0011477 | -6.60112 |
| L10A | HMDB0011542 | -6.5714 |
| L7A | HMDB0240599 | -6.52126 |
| L19B | HMDB0008068 | -6.51068 |
| L22 | LMGP02020094 | -6.38711 |
| L2E | HMDB0007017 | -6.31341 |
| L15D | HMDB0007996 | -6.26592 |
| L24 | HMDB0011339 | -6.17981 |
| L28B | LMGP03010024 | -6.16878 |
| L10B | HMDB0011572 | -5.90149 |
| L28A | LMGP03010007 | -5.79632 |
| L12E | HMDB0263322 | -5.71192 |
| L16A | HMDB0286055 | -5.67682 |
| L12D | HMDB0263324 | -5.67673 |
| L2C | HMDB0007018 | -5.54982 |
| L18F | HMDB0286265 | -5.35392 |
| L23 | LMGP02020093 | -5.35157 |
| L4E | HMDB0295575 | -5.31759 |
| L6 | HMDB0010379 | -5.31248 |
| L16C | HMDB0008004 | -5.05274 |
| L15G | HMDB0285953 | -4.99872 |
| L30A | HMDB0042304 | -4.70524 |
| L4A | HMDB0007105 | -4.66917 |
| L4B | HMDB0007104 | -4.53568 |
| L15H | HMDB0285951 | -4.30747 |
| L18A | HMDB0008038 | -4.00314 |
| L12C | HMDB0263320 | -3.69677 |
| L18E | HMDB0286263 | -3.41181 |
| L17 | HMDB0008035 | -3.32697 |
| L15B | HMDB0011209 | -3.30702 |
| L14B | HMDB0008027 | -3.06514 |
| L2B | HMDB0007298 | -3.04101 |
| L12A | HMDB0007858 | -2.89978 |
| L18C | HMDB0008063 | -2.89591 |
| L30B | HMDB0042159 | -2.7336 |
| L16F | HMDB0008029 | -2.17504 |
| L3 | HMDB0007099 | -2.03529 |
| L2A | HMDB0007269 | -1.95238 |
| L5 | HMDB0007109 | -1.9492 |
| L12B | HMDB0007859 | -1.93988 |
| L30C | HMDB0044053 | -1.91676 |
| L30F | HMDB0042330 | -1.80282 |
| L30E | HMDB0048434 | -1.74325 |
| L30D | HMDB0042939 | -0.70689 |
| L4C | HMDB0290851 | Skip |
| L4D | HMDB0290853 | Skip |
| L11A | HMDB0000674 | Skip |
| L13A | HMDB0007994 | Skip |
| L13B | HMDB0000564 | Skip |
| L14A | HMDB0011207 | Skip |
| L14C | HMDB0008001 | Skip |
| L14D | HMDB0007969 | Skip |
| L15A | HMDB0011210 | Skip |
| L15C | HMDB0007997 | Skip |
| L15E | HMDB0007972 | Skip |
| L15F | HMDB0285949 | Skip |
| L16D | HMDB0008005 | Skip |
| L16E | HMDB0008030 | Skip |
| L16G | HMDB0286053 | Skip |
| L18B | HMDB0008062 | Skip |
| L18D | HMDB0286261 | Skip |
| L19A | HMDB0008101 | Skip |
| L21B | LMGP02020099 | Skip |
