# Supplementary material for: Circulating Lipids Predict Mortality and Drive Immune Gene Regulation in Acute-on-Chronic Liver Failure
Source: Research Square preprint supplement (doi:10.21203/rs.3.rs-8154019/v1), 2025-12-02
Supplement: Supplementary file 15 [file acaac87bbc9e2a5a692cbfca.docx]

**Supplementary Table S9**

| Neutrophil Degranulation proteins with PPARG binding sites | | | |
| --- | --- | --- | --- |
| SERPINA3 | GPI | PKM | GGH |
| ACLY | GSTP1 | MAPK1 | VAPA |
| AP2A2 | HBB | PSMA2 | PRDX6 |
| ALAD | HEXB | PSMA5 | MVP |
| ALDOA | HMGB1 | PSMB1 | ARPC5 |
| ALDOC | HP | PSMC2 | ACTR2 |
| ANPEP | HSPA1B | PSMD1 | CAP1 |
| ANXA2 | HSP90AA1 | PSMD3 | CCT8 |
| APEH | HSP90AB1 | PSMD7 | IQGAP2 |
| APRT | IDH1 | PSMD11 | RAB18 |
| ARG1 | ILF2 | PYGL | COTL1 |
| RHOA | IMPDH2 | RAB5C | HEBP2 |
| ASAH1 | JUP | S100A8 | LAMTOR2 |
| ATP6V0C | LTF | S100A9 | DERA |
| ATP6V0A1 | LYZ | S100A11 | RAB14 |
| C3 | MGST1 | SPTAN1 | CAB39 |
| CAPN1 | MIF | TTR | PGM2 |
| CAT | MPO | VCL | CPPED1 |
| COPB1 | NME2 | VCP | NIT2 |
| DYNC1H1 | ORM1 | XRCC5 | NAPRT |
| SERPINB1 | ORM2 | RAB7A | ARL8A |
| STOM | PA2G4 | PDXK | TUBB |
| FTL | PFKL | VAMP8 | IQGAP1 |
| XRCC6 | PGM1 | SNAP23 | SERPINA1 |
