# Supplementary material for: Circulating Lipids Predict Mortality and Drive Immune Gene Regulation in Acute-on-Chronic Liver Failure
Source: Research Square preprint supplement (doi:10.21203/rs.3.rs-8154019/v1), 2025-12-02
Supplement: Supplementary file 17 [file c3b70d0949bb176e88d8170d.docx]

**Supplementary Figure S 1**

**Lipidomics data normalization in Metaboanalyst**

**
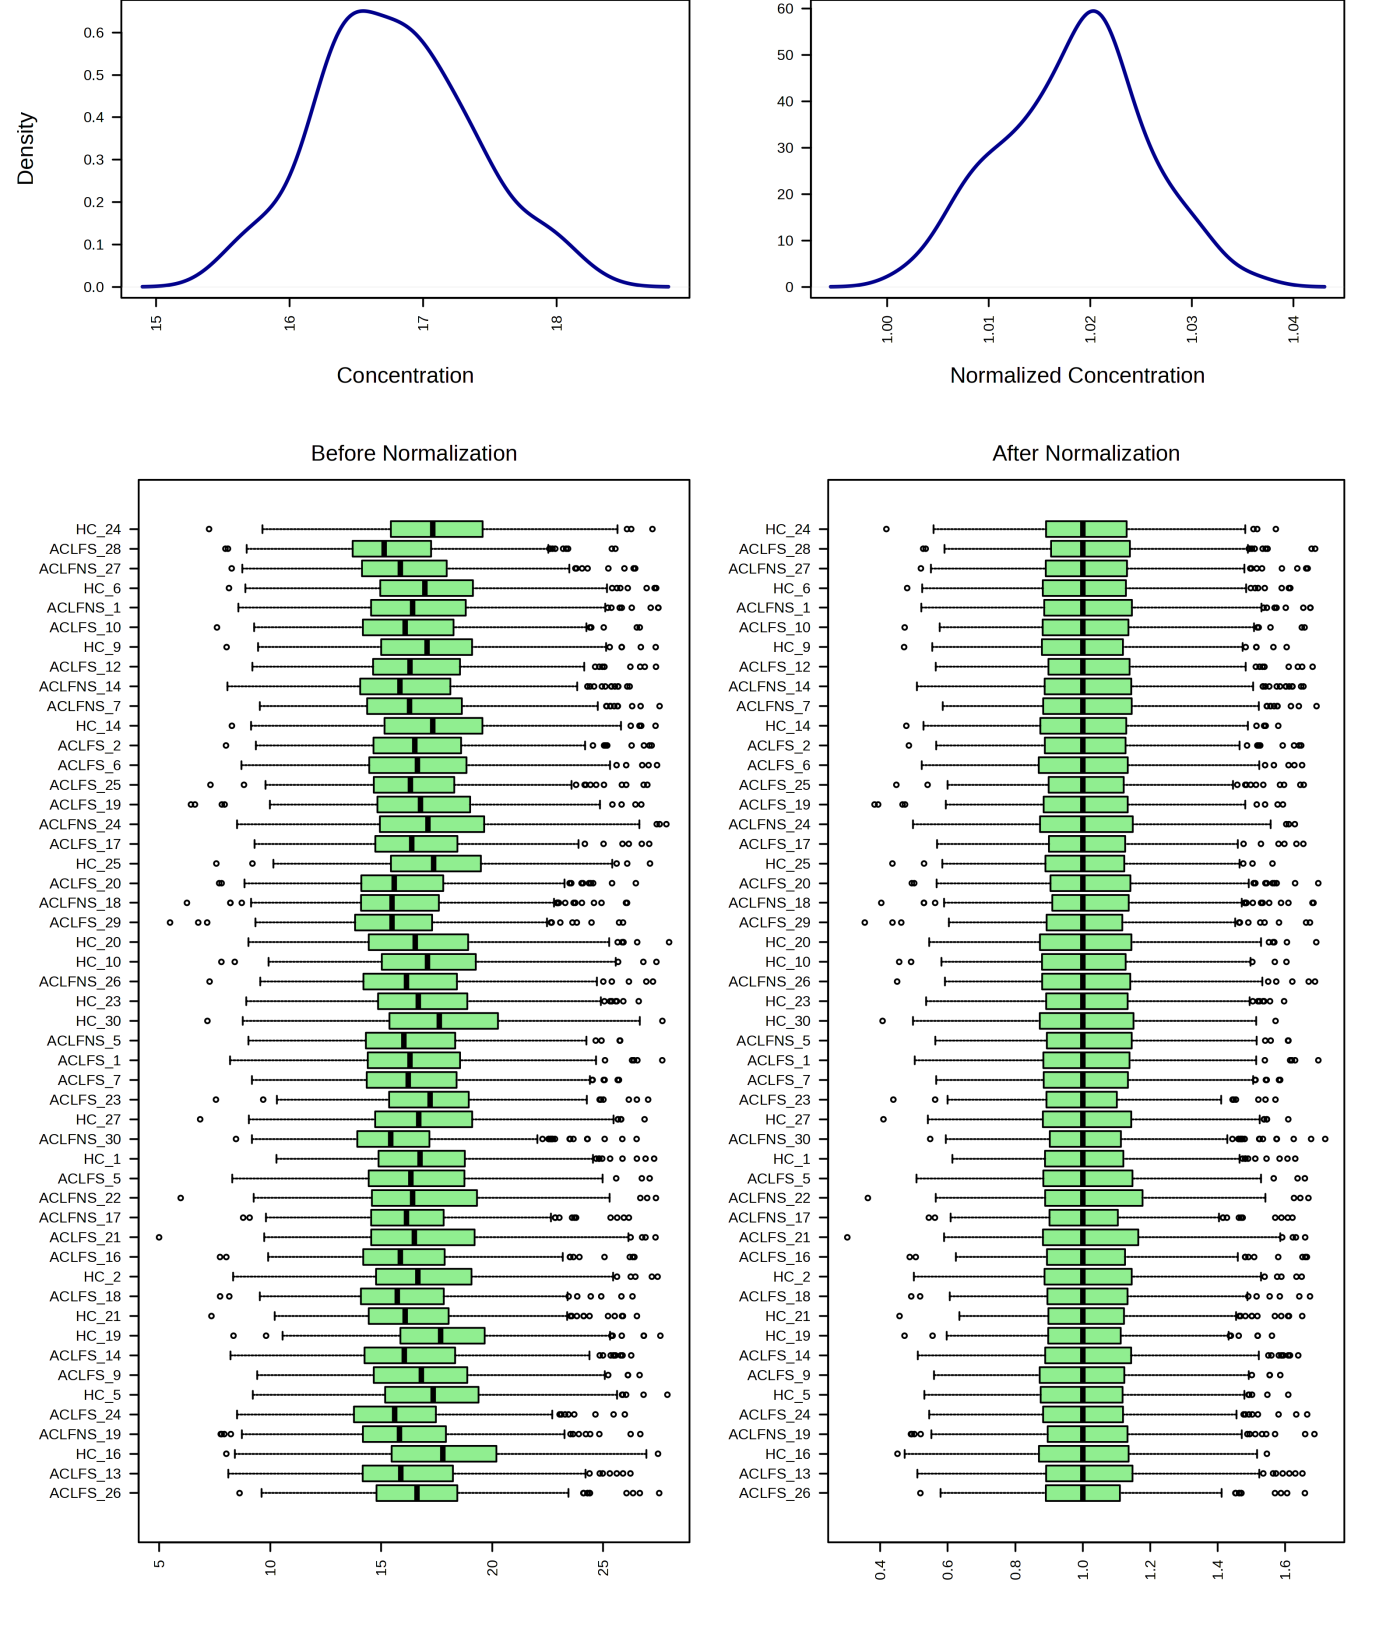
**

**Figure. Representation of samples after data normalization in Metaboanalyst**

Density plot (top panel) and box plots (lower panel) of a representative set of 50 samples showing the effect of data normalization.
