# Supplementary material for: Circulating Lipids Predict Mortality and Drive Immune Gene Regulation in Acute-on-Chronic Liver Failure
Source: Research Square preprint supplement (doi:10.21203/rs.3.rs-8154019/v1), 2025-12-02
Supplement: Supplementary file 18 [file c5f71dd35c5e3db4c038d163.docx]

**Supplementary Figure S 2**

**Mortality associated lipid species in ACLF**

**
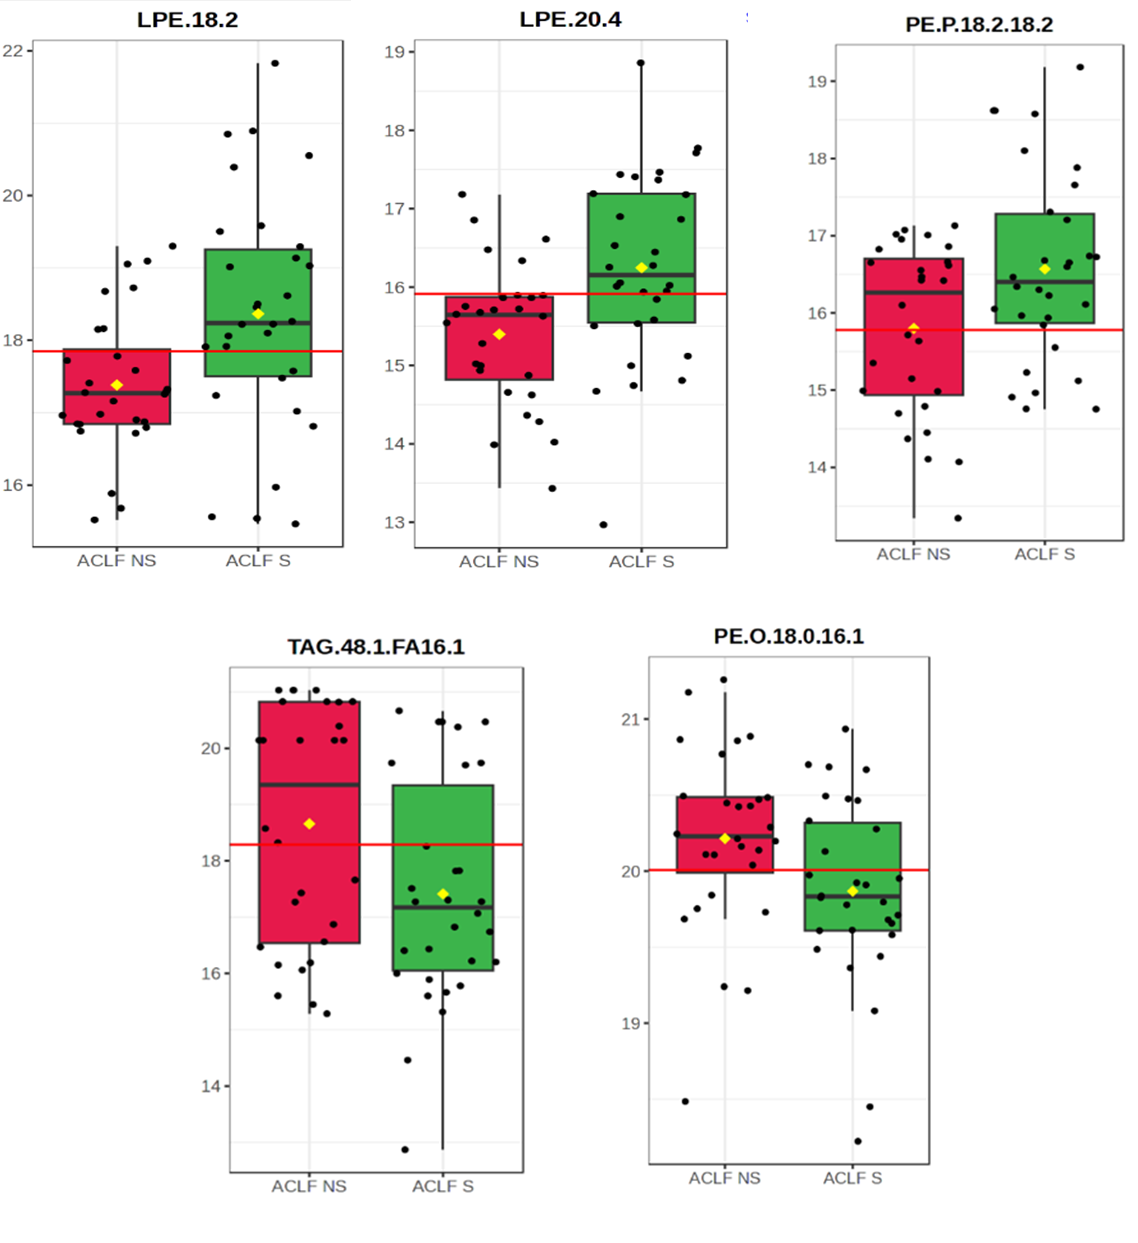
**

**Figure.** Boxplots showing relative abundance of selected lipid species between ACLF survivors (ACLF S) and non-survivors (ACLF NS). LPE(18:2), LPE(20:4), and PE(P-18:2/18:2 were reduced in survivors, whereas TAG(48:1/FA16:1) and PE(O-18:0/16:1) were elevated in non-survivors.
