# Supplementary material for: Circulating Lipids Predict Mortality and Drive Immune Gene Regulation in Acute-on-Chronic Liver Failure
Source: Research Square preprint supplement (doi:10.21203/rs.3.rs-8154019/v1), 2025-12-02
Supplement: Supplementary file 19 [file d194514508bc414f68c3cb73.docx]

**I. Experimental design:**

(i) Experimental groups:

ACLF neutrophils (n=60)

(ii) Control groups:

Healthy neutrophils (n=60)

**II. Sample:**

**Volume/mass of sample processed:**
A total of 6 ml of blood was collected from each study group in EDTA-coated purple-top vacutainers. Plasma was aseptically separated and stored at −80°C until further use.

**PMN Isolation**
Polymorphonuclear neutrophils (PMNs) were isolated using a modified Boyum’s double-gradient centrifugation method. The blood pellet containing the buffy coat was diluted with an equal volume of sterile 1× PBS (VWR, USA, 97062-730) at room temperature (RT). A double gradient was prepared in a 15 ml centrifuge tube by layering Ficoll-Hisep (Himedia, INDIA, LSM 1077) over Granulosep (Himedia, INDIA, LS004) in a 2:3 ratio. The diluted blood was carefully layered on top and centrifuged at 300×g for 30 minutes at RT without brakes.

Following centrifugation, distinct layers were formed in the following order (top to bottom): diluted plasma, PBMC layer, Hisep, PMN layer, Granulosep, and RBC pellet. The plasma was discarded, and the PBMC layer was carefully removed. The enriched PMN layer was collected, resuspended in sterile 1× PBS, and washed twice by centrifugation at 500×g for 10 minutes. Any contaminating RBCs were removed by incubating the washed pellet in 1× RBC lysis solution for 10 minutes at 4°C, followed by two additional washes with 1× PBS.

**RNA Isolation**Total RNA was isolated from cell pellets using the TRIzol™ reagent (Thermo Fisher Scientific, USA, Cat: 15596018) according to the manufacturer's instructions with slight modifications for optimal yield and purity. Briefly, 1000 µL of TRIzol was added to each sample pellet and homogenized thoroughly by pipetting and gentle vortexing. The homogenized samples were incubated at room temperature for 5 minutes to allow complete dissociation of nucleoprotein complexes.

Following incubation, 200 µL of chloroform (SRL, Cat: 30792) was added to each tube, and the samples were vigorously vortexed for 15 seconds, followed by a 5-minute incubation at room temperature. Phase separation was achieved by centrifugation at 12,000×g for 15 minutes at 4°C. The upper aqueous phase, containing RNA, was carefully transferred to a new RNase-free microcentrifuge tube without disturbing the interphase.

An equal volume of isopropanol (Qualigens, Cat: Q13827) was added to the aqueous phase to precipitate RNA. Samples were incubated for 120 minutes at -20℃ temperature and centrifuged at 12,000×g for 10 minutes at 4°C. The resulting RNA pellet was washed twice with 70% ethanol, air-dried for 5–10 minutes, and resuspended in 32 µL of nuclease-free water.

RNA quantity and purity were assessed using a NanoDrop spectrophotometer. Only samples with A260/A280 ratios between 1.8 and 2.0 were included for downstream qPCR analysis.

**III. qPCR target information**

**(i) Primer designing strategy:** The primers for the selected genes were designed using the IDT PrimerQuest tool. The design parameters were set to ensure that all primers span exon-exon junctions, meeting intron-exclusion criteria. Additionally, the primers were designed to amplify mRNA splice variants. The specificity of the designed primers was verified using the NCBI BLAST platform.

**(ii) Manufacturer of oligonucleotides:** IDT

| **Gene Name** | **Primer Sequence (5’->3)** | **Length** | **Amplicon Size** |
| --- | --- | --- | --- |
| **18S** | |  |  |
| Forward | GTAACCCGTTGAACCCCATT | 20 | 151 |
| Reverse | CCATCCAATCGGTAGTAGCG | 20 |  |
| **ELANE** |  |  |  |
| Forward | GGTCTGCAACGGGCTAATC | 19 | 132 |
| Reverse | TCGGAGCGTTGGATGATAGA | 20 |  |
| **CD177** | | | |
| Forward | GGGACGTGTCGTTAGAAATG | 20 | 82 |
| Reverse | CATCTGGGTTGGTGTAAGTG | 20 |  |

**IV. qPCR protocol**:

**(i) Complete reaction conditions:** SYBR green 1 chemistry was used to determine the relative expression of the target genes. The cycling parameters are: Initial denaturation at 95°C for 3 minutes, followed by annealing, amplification and detection for 40 cycles (95°C 30’’, 60°C 20’’, 72°C 20’’) at end-point fluorescence, and melt-curve analysis at 60-95°C at 0.1 °C rise per second at continuous fluorescence to detect specific amplicons.

**(ii) Reaction volume and components:** Reaction volume of total 10 µl: Components were 8 µl mastermix consisting of 5 µl of SYBR Green buffer. Mastermix (Thermo Fisher Scientific Dynamo Flash: F415S), 0.2 µl of forward + 0.2 µl of reverse primers (0.4mM), 2.6 µl of nuclease-free water, and 2 µl of template cDNA.

**(v) Manufacture of qPCR instruments:** Agilent AriaMx Real-Time PCR system was used to carry out the qPCR experiments.

**Keywords and abbreviations**

MIQE: The Minimum Information for Publication of Quantitative Real-Time PCR Experiments qPCR: Quantitative real time PCR

DC: Disease controls

**PCR standardization and primer efficiency:**

18S rRNA was used as the housekeeping gene. Primer validations and standardization of the reaction conditions were done by temperature gradient PCR in Himedia Prima-96™ Well Block system. Reaction conditions were optimized to be same for all the genes, and chosen for qPCR as follows: 95°C 3’, 95°C 30’’, 60°C 20’’, 72°C 20’’.

**References:**

**(In accordance with the MIQE1 guidelines):**<http://clinchem.aaccjnls.org/content/55/4/611>
