# Supplementary material for: Circulating Lipids Predict Mortality and Drive Immune Gene Regulation in Acute-on-Chronic Liver Failure
Source: Research Square preprint supplement (doi:10.21203/rs.3.rs-8154019/v1), 2025-12-02
Supplement: Supplementary file 20 [file ee381da411ffe3df87968b29.xlsx]

## Sheet: Tissue proteome 
S.N.	Lab ID's for Liver biopsies	Lab ID's for Kidney biopsies	AGE	SEX	Hb1	TLC1*1000	Plt1*1000	PT1	INR1	UREA1	S.CR1	S.CR2	S.CR3	S.CR4	S.CR5	S.CR6	S.CR7	BILLIRUBIN (T)1	AST1	ALT1	SAP1	ALBUMIN1	Na	K
1	AIIMS_ACLF_L1	AIIMS_ACLF_K1	23	M	11	6.45	185	43.1	3.34	19	0.6							3.38	85	50	328	3.5	135	5.1
2	AIIMS_ACLF_L2	AIIMS_ACLF_K2	33	M	6.7	17.07	64	21.6	1.944	36.3	1.1	1.1	1.1	1.5	1.4	1.7	2.5	12.4	107	34	96	2	135	2.7
3	AIIMS_ACLF_L3	AIIMS_ACLF_K3	53	M	7.1	13.7	78	27.8	2.527	48.3	1.9		2.2					7.49	61	36	89	2.2	137	2.8
4	AIIMS_ACLF_L4	AIIMS_ACLF_K4	35	M	8.9	12.25	230	14.4	1.246	13	0.7				0.7	0.6	0.3	0.8	75	21	100	3.4	135	6.1
5	AIIMS_ACLF_L5	AIIMS_ACLF_K5	30	F	4.8	10.24	60	19.2	1.691	24	0.7	0.8	0.57	0.1	0.7	1.1	0.9	38.01	446	184	153	2.8	133	3
6	AIIMS_ACLF_L6	AIIMS_ACLF_K6	49	F	11.3	10.48	93	22.3	1.981	9.83	0.69		0.6	0.6	0.5	1.1		15.8	80	20	149	3	139.3	4.13
7	AIIMS_ACLF_L7	AIIMS_ACLF_K7	35	F	9.1	4.21	41	48.9	4.554	39	1.1	0.7	0.9	0.6	0.6		2.5	21.08	528	194	68	3.6
8	AIIMS_ACLF_L8	AIIMS_ACLF_K8	43	F	9.6	12.35	94	26.8	2.357	25	0.6		0.4		0.6		0.6	8.8	204	93	188	2	142	2.3
9	AIIMS_ACLF_L9	AIIMS_ACLF_K9	25	M	5.6	24.51	57	19	1.648	78	2.2		1.8	1.6	1.4	1.8	1.8	33	120	48	112	2	128	2.4

## Sheet: PMN proteome
Groups	Sr no	age	sex	Presence of ascites	HE Grade	Infection	Hemoglobin	TLC	NLR	Platelets x 1000	PT	INR	Urea	Creatinine D1	Creatinine D2	Creatinine D3	Creatinine D4	Creatinine D5	Creatinine D6	Creatinine D7	Sodium	Potassium	Bilirubin	AST	ALT	SAP	Alb	Glob	28-day mortality	OFLiverD1	OfKidneyD1	OFBrainD1	Ofcoag D1	OFcirD1	OFRespD1	ACLF Grade at admisson	Clinical score MELD
1A	ACLF_PMN1	46	1	1	2	1	4.8	17600	3.40404	263	19.8	1.685	76.5	1.15	2.4	2.7	1.8	1.2	1.1	1.2	133	5.5	3.4	192	28	105	2.3	3.2		1	1	0	0	0	1	3	11.5578
1A	ACLF_PMN2	60	1	1	3	0	9.8	25000	22.0476	92	18	1.5	210	8.1	8.1						141	2.4	32	209	97	177	3.1	4.5	1	1	1	1	1	0	0	3	22.7859
1A	ACLF_PMN3	69	1		3	1	10.1	9.17	16.3077	49	19.9	1.69	102	2.3							139	3.7	2.9	50	20	84	2,3	3.3	1	0	1	1	0	0	0	2	14.1919
1A	ACLF_PMN4	26	1	1	4	1	6.3	18270	10.48	129	27	2.3	105	2.2	1.8	2.4					127	4	10	95	43	124	2.8	5.6	1	0	1	1	0	1	1	3	17.5383
1B	ACLF_PMN5	25	1	1	4	1	11.7	27000	8.25	85		9.2	91	3.3							128	5.5	23.85	218	89	227	2.4	5.7	1	1	1	1				3	27.3935
1B	ACLF_PMN6	42	1	1	2	0	7.1	5040	22.225	40	27.3	2.32	195	3.7							119	3.9	5.36	53	45	129	3.4	3.1		1	1	1				3	18.7174
1B	ACLF_PMN7	22	1	1	3	0	7.4	13600	7.89	150	17.6	1.5	193	18.8	13.8	13.9	10	10	6.3	6.3	133	6.1	8.9	140	245	183	3.2	3.8	1	0	1	1	0	0	0	2	24.1846
1B	ACLF_PMN8	33	0	1	2	0	9.5	8240	5.71831	80		17	18	0.5							127	3.3	32	218	111	124	3.1		1	1	0	1	1	0	0	3	23.0196
1C	ACLF_PMN9	33	1	1	1	?	9	2790	15.4545	188		2.6	84	1.4	2.6	1.4	1.4	1.5	1.9	2.2	134	3.3	34	30	93	177	3.2			1	1	1	1	0	0	3	18.2651
1C	ACLF_PMN10	51	1	1	4	0	6.7	10800	18.52	113	24.5	2.1	78	1.3	1.1	1.3	1	0.8	0.9	0.8	136	3.9	5.15	30	26	78	2.6	4	0	0	1	1	1	0	0	3	13.8199
1C	ACLF_PMN11
1C	ACLF_PMN12	26	1	1		0	6.9	8200	5.05	104	30.1	3.2	33	1.4							130	3.7	19	164	60	70	2.6			1	0	0	1	0	0	2	18.3198

## Sheet: PMN transcriptome
name	age	sex	HB1	TLC	Platelet	INR	Urea	Creatinine	Sodium	Portassium	Bilirubin	AST	ALT	SAP	Albumin	MELD_1	CTP1	28-day mortality	ACLF Grade at admisson
ACLF PMN_RNA1	19	1	5	20000	40	4	44	0.8	160	3.3	20	179	39	143	2	33	15	1	3
ACLF PMN_RNA2	55	1	6.2	10000	46	2.6	257	3.8	133	6.4	1.8	27	19	340	2.2		13	1
ACLF PMN_RNA3	56	1	10	11300	25	2.07	116	1.5	134	3.5	4.2	72	56	265	2	23	15	1	3
ACLF PMN_RNA4	68	1	11.4	34220	87	4.78	157	3.6	131	4.8	12.2	2784	894	662	3.2			0
ACLF PMN_RNA5	36	1	7.6	21900	30	3.5	50	2.2	129	5.64	7.2	254	198	730	2.1		15	1	3
ACLF PMN_RNA6	30	2	8.2	3900	40	2.8	66	1.9	125	3.2	31	44	25	251	2.7	20		0	3
ACLF PMN_RNA7	22	2	13.6	13300	87	4.8	15	1.6	147	2.5	22.8							1	2
ACLF PMN_RNA9	55	1	7.5	8900	54		267	9.1	145	5.15	8.5					47		1
ACLF PMN_RNA10		1
ACLF PMN_RNA11	46	1	13.1	8790	50	1.7	53	1.1	139	3.4	7.1	207	91	1016	1.7	20	12	0	3
ACLF PMN_RNA8	24	1	0	10.3	7500	150	3.6	36	0.8	136	4.9	48.8	254	140	193	4.1	33	10	1
ACLF PMN_RNA12	63	1	0	7.5	7710	232	1.54	23	0.7	138	3.9	1.3	49	19	193	3.5	9	9	1

## Sheet: Plasma lipidome derivation
Lipidomics serial number	age	sex	TLC	Platelet x1000	INR	Urea	Creatinine	Sodium	Potassium	Bilirubin	AST	ALT	SAP	Albumin	Infection	Mortality	OFLiverD1	OfKidneyD1	OFBrainD1	Ofcoag D1	OFcirD1	OFRespD1	ACLF Grade at admisson	Meld score	MELD-NA	CLIF-C ACLF	CTP	PaO2	FiO2	PaO2/ FiO2 ratio	HE grade	Ascites grade	BPS1	BPD1	MAP
N1	24	1	7500	150	3.6	36	0.8	136	4.9	48.8	254	140	193	4.1	0	1	1	0	0	1	0	0	2	33.3366	34.0029	35	10	68	0.21	323.81	0	1	100	60	73.3333
N10	30	1	36000	30	4	148	2.1	128	4.8	9	216	67	197	2.6	1	1	0	1	1	0	1	1	3	37.3623	38.1536	61	14	89	0.6	148.333	3	1	80	70	73.3333
N11	29	1	14310	66	18	33	1.1	136	3.4	35.39	98	38	122	2.9	1	1	1	0	1	1	1	1	3	40	40	48	11	11.8	0.21	56.1905	0	1	126	76	92.6667
N12	43	0	8800	195	1.7	50	0.7	146	3.6	21.7	1065	391	214	3.3	0	1	1	0	1	0	0	0	2	20.5919	26		11				2	1	110	70	83.3333
N13		1	11030	69	3.65	228	6.5	138	3.5	35	101	42	215	2.2	1	1	1	1	1	1	0	1	3	40	40		14		0.5		3	1	100	70	80
N14	45	1	19410	129	3.48	190	10.8	120	5.1	23.2	137	61	147	2.5	1	1	1	1	0	1	0	0	3	40	40		15	83.3			1	1	76	44	54.6667
N15	35	1	26900	87	1.73	163	3.6	132	5.6	8.9	60	29	209	3.2	1	1	0	1	1	0	1	1	3	33.0908	34.4726	44.44	14	40			4	1	95	66	75.6667
N17	29	1	9600	41	2.9	71	0.9	130	3.7	14	318	75	140	2.3	1	1	1	1	1	1	0	0	3	27.3221	30.4916		13				2	1	100	60	73.3333
N18	45	1	14700	172	2.4	87	2.1	137	5.7	5	42	13	147	2.3	1	1	0	1	1	0	0	0	2	29.4193	30.2128	51	13	84	0.35	240	3	1	144	56	85.3333
N19	35	1	20200	149	2.17	64	2.9	116	3.6	21	160	45	242	2	1	1	1	1	0	1	1	0	3	36.8045	38.7218	53	13	79.4	0.21	378.095	1	1	68	38	48
N2	22	2	13300	87	4.8	15	1.6	147	2.5	22.8					0	1	1	0	1	1	0	0	2	40	40		10				2	1	120	70	86.6667
N20	45	1	24800	100	1.9	229	7.6	134	6.4	8	55	33		2.4	1	1	0	1	1	0	1	0	3	40	40	58	13	88	0.32	275	3	1	108	60	76
N21	36	1	21900	30	3.5	50	2.2	129	5.64	7.2	254	198	230	2.1	1	1	0	1	0	1	1	0	3	35.4685	36.7147		15	65			3	1	100	60	73.3333
N22	33	1	48000	107	1.6	113	4.4	118	6	26	113	65		2.6	1	1	1	1	0	0	0	0	2	38.1886	39.1849	60	13	66	0.91	72.5275	1	1	130	70	90
N24	33	1	19400	380	1.92	157	9.2	130	5.1	35	174	33	159	2.9	1	1	1	1	1	1	0	0	3	40	40		11		0.21		2	1	110	74	86
N25	24	1	13290	93	2.35	56.6	1.2	151	6.2	10.9	79	47	147	3.3	1	1	1	1	1	1	0	0	3	26.7738	26.7738	42	12	101	0.5	202	4	1	112	74	86.6667
N26	20	1	7600	170	2.5	31	1.5	131	4.4	17	160	88	112	2.3	2	1	1	1	0	1	0	0	3	31.2823	33.2438	37	12	53	0.21	252.381	0	1	96	50	65.3333
N27	38	2	5460	31	3.9	170	2.1	158	4.8	12.5	54	25	108	2.5	5	1	1	1	1	1	0	0	3	38.3205	38.3205	49	13	86.8	0.21	413.333	2	1	120	70	86.6667
N28	55	1	20500	95	1.68	127	2.7	134	3.5	27	166	65	183	3	1	1	1	1	1	0	0	0	3	34.2042	35.0735	61	10	25.2	0.21	120	1	1	90	60	70
N29	33	1	14000	115	2.2	45	1.2	138	4.3	16	69	37	188	2.4	0	1	1	0	0	1	0	0	2	27.4859	28.1116		11				0	1	110	60	76.6667
N3	38	1	10300	80	4.2	169	6	110	4	8	790	870		2.3	1	1	0	1	1	1	1	1	3	40	40		14	100			4	1	80	60	66.6667
N30	34	1	36290	100	2.95	156	3.5	144	2.5	37.4	105	32	199	2.9	1	1	1	1	1	1	0	0	3	40	40		14				2	1	103	61	75
N4	50	1	12300	100	2.5	20	0.7	124	4	9	54	37	180	1.8	1	1	0	0	0	1	0	0	1	21.5846	28.9507	49	13	191	0.6	318.333	1	1	146	90	108.667
N5	32	1	6200	50	4.48	45	0.8	125	3.9	22.5	130	65	148	2.8	0		1	0	0	1	1	0	3	32.8594	35.5371		12				1	1	70	40	50
N6	35	2	4210	41	4.55	39	1.1	142	4.5	21.08	528	194	168	3.6	0	1	1	0	1	1	0	0	3	35.8342	35.6259		10				2	0	107	60	75.6667
N7	32	1	8270	36	2.75	89	1.8	144	4.3	8.8	186	63	196	2.2	0	1	1	1	0	1	0	0	3	31.6056	31.64		14				2	1	80	40	53.3333
N8	50	1	12200	90	2.34	72	0.9	133	3.4	9.2	90	44	199	2	0	1	0	0	1	0	0	0	2	23.332	26.2489	52	13	54	0.21	257.143	4	1	90	60	70
N9	70	1	10570	94	3.25	54	0.9	148	3.6	6	46	18	136	2.3	0	1	0	0	1	1	0	1	3	25.3955	26.41	66	13	49.2	0.6	82	3	0	120	62	81.3333
S1	35	1	6270	212	1.76	10	0.8	138	3.3	13.3	112	25	108	3	0	0	1	0	1	0				20.4078	21.3874						3	1	115	68	83.6667
S10	32	1	18000	195	3.4	100	2.5	118	3.3	18.6	234	31	163	2.7	0	0	1	0	0	1	0	0	2	39.9547	39.9796	41.25	12	93	0.2	465	0	1	120	80	93.3333
S11	40	1	8220	129	1.68	51	1.08	145	5.1	2.81	98	40	170	2.9	0	0	1						1				7				0	0	110	60	76.6667
S12	70	1	16500	180	2.5	38	1	137	4.1	15.9	192	163	131	3.4	1	0	1	0	0	1	0	0	2	27.1491	28.113		10				0	1	128	74	92
S13	47	1	9600	191	1.17	25	0.9	139	4.7	4.3	231	31	206	2.5	0	0	1	1	0	1	0	0	3				10				0	1	100	70	80
S14	40	1	6300	72	1.12	19	1	136	4.1	4.8	140	25	190	3	0	0	1	1	1	1	1	1	3				9				0	1	110	70	83.3333
S15	39	2	12200	77		92	2.6	133	4.9	15	149	77	187	2.1	1	0	1	1	1	0	1	0	3	32	33.06			42.8			4	1	110	70	83.3333
S16	38	1	5000	60		64	1.5	137	4.6	8.4	35	19	152	4.2	0	1	1	1	0	1	0	0		32.73	32.73	38.34	12	70			1	1	100	60	73.3333
S17	32	1	3400	96	2.7	44	1	134	3.9	5	45	36	184	5.5	0	0	1	1	1	1	0	0	3	23.6381	26.0924						3	1	136	82	100
S18	42	1	7800	71		27	0.6	140	4.7	11.4	47	27	179	5.8	0	0								23.41	23.41	36.14	12				0	1	102	80	87.3333
S19	48	2	1170	20		61	1.8	133	5.95	28	58	19	178	3.3	0	0	1	0	0	0	1	0	2	28.39	29.93		9				0	1	80	60	66.6667
S2	54	2	7400	185	1.5	32	1.1	142	3.51	18.9	101	77	128	3.2	0	0	1	0	0	0	0	0	2	22.9934	22.143							1	82	50	60.6667
S20	48	1	2500	27	2.3	80	1.23	144	4.35	9.8	123	61	141	2	0		1	0	1	1	1	1	3	26.3671	25.0038		13				3	1	120	70	86.6667
S21	50	2	11490	108		87	2.1	141	2.2	35.3	54	39	234	3.2	0	0	1	1	1	1	0	0	3	32.33	32.33		8				2	0	110	70	83.3333
S22	42	1	14140	93		156	5	144	3.9	16	186	57	166	2.8	0	0	1	1	0	0	0	0	2	40.15	40						2	1	108	62	77.3333
S23	45	2	2870	100		6.4	0.5	128	3.4	0.69	44	30	115	3.3	1	0	0	1	0	0	0	0	1	14.92	22.37						0	1	130	70	90
S24	35	1	13400	74	1.9	55	2.8	137	4.3	7.8	127	53	143	1.6										31.2368	31.8941		13				3	1	140	90	106.667
S25		1																						#NUM!	#NUM!						4	1	90	60	70
S26	30	1	17360	80	2.88	54	0.8	141	4.4	6.54	468	168	188	2.3		0	0	0	1	1	1	0	3	31	31	53	14	38.5	0.3	128.333	3	1	130	60	83.3333
S27		1	7200	175	3.1	42	1.33	136	2.99	22.49	100	28	197	2.8	0									33.5983	34.2385		11				1	1	116	64	81.3333
S28	18	2	5600	11		129	2.9	141	3.9	15.3	78	37	159	1.6	0	1	1	1	1	1	0	0	3	38.91	38.91	37.65	12	60.5			2	0	117	62	80.3333
S29	38	1	5650	25		209	3	150	3.4	17.3	41	31	170	3.5	1	0	1	1	0	1	0	0	3	39.93	39.93			164.2	0.4	410.5	2	1	158	96	116.667
S3	36	1	20140	181	1.83	21	0.2	136	4.2	29.3	111	218	150	3	0	0	1	0	0	1	0	0	2	26	27.4	50	10	25.4	0.21	120.952	1	0	108	68	81.3333
S30	31	1	19700	252	1.59	22	0.6	133	2.6	17.5	126	45	183	2.3	0	0	1	0	0	1	0	0	2				10				0	1	140	80	100
S4	28	1	8830	137	3.32	12	1.1	134	3.3	27.4	178	90	127	2.6	0	0	1	0	0	1	0	0	2	33	33	48	13	17.3	0.21	82.381	1	1	110	60	76.6667
S5	33	1	7480	73	1.906	15	0.8	133	2.9	176	166	97	144	2.9	1	0	1	0	1	0	1	0	3	31.063	32.627		12	38.3			3	1	102	64	76.6667
S6	60	2	23430	90	1.878	76	2.1	144	5.6	2.47	5212	1126	242	2.5	1	0	0	1	0	1	1	0	3	24.0066	22.4073		9				0	0	92	70	77.3333
S7	33	1	8830	137	3.32	12	1.1	134	3.3	27.4	178	90	127	2.6	0	0	1	0	0	1	0	0	2	33.2956	34.3012		12				0	1	130	60	83.3333
S8	62	1	15400	183	1.54	86	2.1	150	3.3	1.7	46	17	167	2.7	0	0	0	1	0	0	0	0	2	20.3721	20.37	48	9	68	0.21	323.81	2	1	110	70	83.3333
S9	40	1	3080	80	1.94	59	1.2	138	4.7	2.54	20	98	158	4.5	1	0	0	1	0	1	0	0	2	19.1205	20.1645		8				0	0	110	68	82

## Sheet: Plasma lipidome validation
Lipidomics serial number	age	sex	TLC	Platelet x1000	PT 1	INR	Urea	Creatinine	Sodium	Potassium	Bilirubin	AST	ALT	SAP	Albumin	Globulin	Infection	Etiology acute	Etiology chronic	Mortality	OFLiver	OfKidney	OFBrain	Ofcoag	OFcirD1	OFResp	ACLF Grade at admisson	Meld score	MELD-NA	CTP1	HE grade	Ascites grade	Died after admission (days)	ventilation any time
NS1	17	2	28.08	121	96	8.42	19	0.6	130	3.7	23.36	665	435	189	2.4	4.5	0	14	14		1	0	0	1	0	0	2	37.3151	37.9353	11			5
NS10	35	1	16.7	78	23.8	2.19	163	3.6	132	5.6	8.9	60	29	209	3.2	4.4	0				1	1	0	0			2	35.7315	36.4358	10
NS11	46	1	61440	205	19.6	1.76	97	3.5	133	5	26.2	97	48	444	2.9	4	1	10	2	0	1	1	0	1	0	0	3	37.095	37.4785	9	0	1	9	0
NS12	38	2	33420	286	30	2.7	17	1.3	137	3.5	30	580	372	105	2.5		0	2	5		1	0	0	1	1	1	2	32.9218	32.9218	11			4
NS13	46	1	24700	115	56.1	5.083	188	2.2	127	5	19.1	60	30	95	2.1	4.2	1	10	2	1	1	1	1	1			3	43.3355	42.2348	15	3		20	1
NS14	45	2	4100	49	37	3.5	34	0.6	135	4.6	5	53	28	193	2		0	8	1	1	1	0	0	1	1	0	2	21.656	22.8667	13	0
NS15	36	1	4820	111	24.3	2.197	45.5	2.5	134	3.6	27	138	53	127	3.2	5.2	0	10	2	1	1	1	0	0	0	0	2	36.4726	36.8218	9	0	0	5
NS16	24	1	7500	150		3.6	36	0.8	136	4.9	48.8	254	140	193	4.1		0	14	3	1	1	0	1	1	0	0	2	33.3366	33.5565	10
NS17	34	1	36290	100	32	2.95	156	3.5	144	2.5	37.4	105	32	99	2.9	1.8	1	8, 10	2	1	1	1	1	1	0	0	3	44.2251	45.2011	14	2	1	7	1
NS18	35	2	4210	41	48.9	4.55	39	1.1	142	4.5	21.08	528	194	68	3.6	3.8	0	14, 8	3	1	1	0	1	1	0	0	3	35.8342	35.1469	10	2	0	7	0
NS19	44	1	20720	142	37.9	3.488	34	0.9	130	4.9	10.1	70	92	149	2.5	5.1	1	8, 10	1, 2	1	1	0	1	1	0	0	3	28.1556	30.8916	13	2	1	15	1
NS2	66	1	13.6	77	16.1	1.412	151	2.13	130	6.7	1.29	58	45	103	2.2	3.3					0	0		0			1	18.4927	23.4609	7			9
NS20	25	1	27000	85		9.2	91	3.3	128	5.5	23.85	218	89	227	2.4	5.7	1	11	3	1	1	1	1	0	0	0	3	54.7003	50.3343	14	4	1	2
NS3	33	1	5130	47	23.7	1.98	119	1.1	133	4.9	9.78	48	39	129	2.1	3	1	8	2	1	1	0	1	0	0	0	3	23.6125	25.7756	13	4	1	4	1
NS4	63	1	8000	36	25.1	2.23	88	1.6	139	6.6	2.76	66	70	73	2.7	4.3	1	6	2	1	0	1	1	0	0	1	3	23.7479	22.6753	12	4	1	9	1
NS5	36	1	20500	124	24.2	2.02	24	0.7	138	5.5	2.7	39	40	128	2.2	3.8	0	7	2	1	0	0	1	0	1	0	2	14.6458	13.8091	11	4	0	15	1
NS6	26	1	18270	129	27	2.3	105	2.2	127	4	10	95	43	124	2.8	5.6	1	10	2	1	0	1	1	0	1	1	3	32.0079	34.6453	12	4	1	2	1
NS7	34	1	5840	55	49.3	3.85	60	2.5	125	7	27	304	155	170	3.1	5.9	0	10	2	1	1	1	1	1	0	0	3	42.7556	41.6644	12	2	1	15	0
NS8	22	1	13600	150	17.6	1.5	193	18.8	133	6.1	8.9	140	245	183	3.2	3.8	0	8	1, 2	1	0	1	1	0	0	0	2	47.3115	46.3464	11	3	1	9	1
NS9	43	2	8800	195	47.9	4.47	27	1.5	152	2.7	31.5	752	212	376	3.3	2.2	0	5	3	1	1	1	1	1	0	0	3	40.122	40.1824	11	3	1	2	1
S1	43	1	2.13	93	26.1	2.367	103.8	2.7	132	4.7	6.3	79	47	201	2.5	5.2					0	1		0			1	32.5429	33.7733	11			180
S10	35	2	10500	60	26	2.6	57	0.7	145	3.5	24.3	52	44	81	2.6	3	0			0	1	0	1	0	0	0	2	29	30	13	1		890
S11	63	1	7710	232			23	0.7	138	3.9	1.54	1.3	49	19	1.93	3.5	0				1	0					1	29	30	9
S12	35	1	12400	238	20.4	1.78	14	0.8	141	3.6	18.5	126	34	698	3.1	2.8	0	10,8	2	0	1	1	1	1			3	21.7818	19.377	12	1
S13	38	1	27600	189	23.2	1.97	52.2	1.9	122	3.5	22.3	143	37	166	2.5	4.6	0	10	2	0	1	1	0	0	0	0	2	31.9019	35.9104	12	1	1	106	0
S14	48	1	4.5	50	19.6	1.668	33	1	131	3.2	5.65	76	27	115	2.6	4.3	0	10	2	0	0	0	0	1	1		1	18.7059	22.9221	10	0	0		0
S15	51	1	1440	170	26.5	2.3	43	2.1	133	4.1	30.2	133	36	139	2.6	4.2	0	10	2	0	1	1	0	0	0	0	2	35.7406	36.3028	11	0	1	130	0
S16	28	1	3560	69	14.1	2.3	101	4	132	5.3	4	47	32	112	2.4			2	1		0	1	1	0	0	0	2	34.2656	35.2118	13	1
S17	40	1	24000	140	25	2.4	61	1.2	144	3.8	14	110	25	116	3.9	3.4	1	8	2	0	1	0	0	1	0	1	3	27.9557	25.1735	10	0	1		0
S18	54	2	6120	153	18.3	1.607	15	1	141	3.5	9.9						0	14	3	0	1	0		0			1	20.4087	17.8227
S19	38	1	9840	236	25.3	2.2	81	2.5	129	5.7	21.3	306	131	246	2.7	4.2	0	10	2	0	1	1	0	0	0	0	2	35.5915	36.7554	11	0	1	112	0
S2	32	2	9430	200	22.1	1.99	42	1.7	131	4.9	14.8	216	103	198	2.5	4.7	1	14	3	0	1	1	0	1	0	0	3	29.4009	31.4995	11	0	1	805	0
S20	32	1	15840	112	20.9	1.8	88	1.1	132	4	16.1	112	33	188	2.4	3.6	0	10	2	0	1	0	1	0	0	0	2	24.4293	26.9984	12	2	1	100	0
S3	28	2	16700	141	31.5	2.878	19	0.5	129	3.9	3.5	144	122	177	2.3	4.8	1	8	3	0	0	0	0	1	1	0	2	16.3715	22.6094	12	0	1	440	0
S4	18	1	10400	116	40.6	3.15	33	1.1	131	4	24	274	208	161	2.8	4.9	0	5	1	0	1	0	0	1	0	0	2	32.2061	33.7493	12	0	1	732	0
S5	53	1	6.37	89	64.5	6.064	49	1.4	135	5.4	22.74	118	44	210	2.9	4.8	1	10	2		1	1	1	1			3	41.6458	41.5372	11	1
S6	54	1	4.66	270	33.2	2.945	14.4	0.6	142	2.8	25.3	211	184	120	3.1	3.5	0	10	1,2		1	0		1			2	25.8511	23.5165	11
S7	30	1	7.03	156	30.1	2.66	152	4.9	137	4	40.1	113	41	183	3.1	4.6	1	2,8, 10	1, 2	1	1	1	1	1			3	46.5496	46.5496	13	3
S8	50	1	12270	20	13.8	1.2	177	2.2	132	5.4	17.6	93	71	215	2.7	4.3	1	8, 10	2	0	1	1	0	0	1	0	3	26.8582	29.0266	10	0	0	241	0
S9	40	1	10.57	89	50.2	4.67	63	2	130	5.7	12.3	81	20	83	1.8	3.5		10	2	0	1	1		1			2	39.8107	39.8544	12
