# Supplementary material for: Circulating Lipids Predict Mortality and Drive Immune Gene Regulation in Acute-on-Chronic Liver Failure
Source: Research Square preprint supplement (doi:10.21203/rs.3.rs-8154019/v1), 2025-12-02
Supplement: Supplementary file 21 [file fa92af8c7463afffaeae6bb9.docx]

**Supplementary Table S3**

**Total 30 validated lipids among ACLF versus healthy controls**

| Species | Regulation |
| --- | --- |
| CE.24.1..H | ACLF NS - HC; ACLF S - HC |
| DAG.14.0.18.3..NH4 | ACLF NS - HC; ACLF S - HC |
| DAG.16.0.16.1..NH4 | ACLF NS - HC; ACLF S - HC |
| DAG.16.0.18.3..NH4 | ACLF NS - ACLF S; ACLF NS - HC; ACLF S - HC |
| DAG.16.1.20.2..NH4 | ACLF NS - HC; ACLF S - HC |
| LPC.14.0..AcO | ACLF S - ACLF NS; HC - ACLF NS; HC - ACLF S |
| LPE.18.2..H | HC - ACLF NS; HC - ACLF S |
| LPE.20.4..H | HC - ACLF NS; HC - ACLF S |
| LPE.22.5..H | HC - ACLF NS; HC - ACLF S |
| MAG.20.0..NH4 | ACLF NS - HC; ACLF S - HC |
| PA.16.0.16.0..H | ACLF NS - HC; ACLF S - HC |
| PA.16.0.18.1..H | ACLF NS - HC; ACLF S - HC |
| PC.16.0.16.0..AcO | ACLF NS - HC; ACLF S - HC |
| PC.16.0.16.1..AcO | ACLF NS - HC; ACLF S - HC |
| PC.16.0.18.1..AcO | ACLF NS - HC; ACLF S - HC |
| PC.16.1.18.1..AcO | ACLF NS - HC; ACLF S - HC |
| PC.18.0.16.1..AcO | ACLF NS - HC; ACLF S - HC |
| PC.18.0.18.1..AcO | ACLF NS - HC; ACLF S - HC |
| PC.18.1.16.1..AcO | ACLF NS - HC; ACLF S - HC |
| PC.18.1.18.1..AcO | ACLF NS - HC; ACLF S - HC |
| PE.O.16.0.18.3..H | ACLF NS - ACLF S; HC - ACLF S |
| PE.O.18.0.16.0..H | ACLF NS - HC; ACLF S - HC |
| PE.O.18.0.16.1..H | ACLF NS - HC; ACLF S - HC |
| PE.P.16.0.16.1..H | ACLF NS - HC; ACLF S - HC |
| PE.P.18.2.18.2..H | HC - ACLF NS; HC - ACLF S |
| PI.18.0.20.5..H | ACLF NS - HC; ACLF S - HC |
| PI.18.1.18.1..H | ACLF NS - HC; ACLF S - HC |
| PS.16.0.18.1..H | ACLF NS - HC; ACLF S - HC |
| PS.20.0.18.1..H | ACLF NS - HC; ACLF S - HC |
| TAG.48.1.FA16.1..NH4 | ACLF NS - HC; ACLF S - HC |
